## Climate-change risk analysis for global urban forests

Manuel Esperon-Rodriguez<sup>1</sup>, John B. Baumgartner<sup>2</sup>, Linda J. Beaumont<sup>3</sup>, Jonathan Lenoir<sup>4</sup>, David Nipperess<sup>3</sup>, Sally A. Power<sup>1</sup>, Benoît Richard<sup>5</sup>, Paul D. Rymer<sup>1</sup>, Mark G. Tjoelker<sup>1</sup>, Rachael V. Gallagher<sup>3</sup>

<sup>1</sup> Hawkesbury Institute for the Environment, Western Sydney University, Locked Bag 1797, Penrith NSW 2751 Australia.

<sup>2</sup> Centre of Excellence for Biosecurity Risk Analysis (CEBRA), School of BioSciences, University of Melbourne, Parkville, Victoria, Australia.

<sup>3</sup> Department of Biological Sciences, Macquarie University North Ryde, NSW 2109, Australia.

<sup>4</sup> UR 'Ecologie et Dynamique des Systèmes Anthropisés' (EDYSAN, UMR 7058 CNRS-UPJV), Université de Picardie Jules Verne, Amiens, France.

<sup>5</sup> Normandie University, UNIROUEN, INRAE, ECODIV, 76000 Rouen, France.

\*Corresponding author: [m.esperon-rodriguez@westernsydney.edu.au](mailto:m.esperon-rodriguez@westernsydney.edu.au)

All authors, except for MER and RVG, are listed alphabetically.

## 1 **Summary**

2

3 Urban forests (i.e. all vegetation present in urban areas), provide environmental and socio-  
4 economic benefits<sup>1</sup> to more than half of the global population<sup>2</sup>. Projected climate change  
5 threatens these benefits to society<sup>3-5</sup>. Here, we assess vulnerability to climate change of 16,006  
6 plant species present in the urban forests of 1,010 cities within 93 countries, using three  
7 vulnerability metrics: exposure, safety margin and risk. Exposure expresses the magnitude of  
8 projected changes in climate in a given area, safety margin measures species' sensitivity to  
9 climate change, and risk is the difference between exposure and safety margin<sup>6</sup>. We identified  
10 9,676 (60.5%) and 8,344 (52.1%) species exceeding their current climatic tolerance (i.e. safety  
11 margin) for mean annual temperature (MAT) and annual precipitation (AP), respectively. By  
12 2050, 13,479 (84.2%) and 9,960 (62.2%) species are predicted to be at risk from projected  
13 changes in MAT and AP, respectively, with risk increasing in cities at lower latitudes. Our  
14 results can aid evaluation of the impacts of climate change on urban forests and identify the  
15 species most at risk. Considering future climates when selecting species for urban plantings  
16 will enhance the long-term societal benefits provided by urban forests, including their  
17 contribution to mitigating the magnitude and impacts of climate change.

## 18 Introduction

19 Urban areas span approximately three percent of the Earth's land surface area<sup>7</sup>, and  
20 accommodate more than 4.2 billion people, representing 55% of the global population<sup>2</sup>. Within  
21 cities, vegetation present in parks, woodlands, abandoned sites and residential areas and along  
22 streets - collectively referred to as urban forests<sup>8</sup> - provide environmental services and socio-  
23 economic benefits, such as carbon sequestration and heat mitigation throughout microclimate  
24 processes<sup>1</sup>. Furthermore, urban forests are crucial for mental health improvement in time of  
25 societal crisis, such as the COVID-19 pandemic<sup>9</sup>. By 2050, cities are expected to expand in size  
26 and in population around the globe, with predictions of 6.6 billion people living in urban areas  
27 by this time (~70% of the predicted global population)<sup>2</sup>. As human population grows, so too  
28 will the societal demand on urban forests.

29 The pace at which climate is changing<sup>10</sup> poses a serious threat to the continued  
30 persistence of urban forests globally. While the impacts of climate change on natural  
31 ecosystems, both terrestrial and aquatic, have been widely studied<sup>11-13</sup>, less is known about  
32 potential impacts on urban ecosystems (but see<sup>14,15</sup>). To date, there have been no global  
33 assessments of the vulnerability of urban forests to future climate change, although several  
34 independent regional-scale studies have been conducted<sup>3,5</sup>. Urban forests have the potential  
35 to mitigate the adverse effects of global climate change by shading buildings and paved  
36 surfaces to reduce energy usage<sup>16</sup>, decreasing urban heat through evapotranspiration,  
37 capturing greenhouse gases and storing carbon through photosynthesis<sup>17</sup>, thereby collectively  
38 contributing to limiting the rise in global temperature to 1.5°C above pre-industrial levels as  
39 outlined in the Paris Agreement<sup>18</sup>. Therefore, there are good reasons to assume that planting  
40 and preserving climate-resilient plant species, in public and private space in cities, can  
41 contribute to mitigating the adverse impacts of global climate change, and enable urban  
42 forests to continue to play an essential role in people connection to nature<sup>1</sup>.

43 Natural and urban ecosystems are already being impacted by changing climate  
44 conditions resulting in sub-optimal growth and increased mortality<sup>19,20</sup>. Climate change  
45 exacerbates the risk of severe summer drought in many regions of the world and extreme  
46 events – such as heatwaves and cyclones, which are predicted to increase in frequency and

47 severity<sup>21,22</sup> – are already contributing to extensive tree mortality globally<sup>19,23</sup> (**Figure 1**). In  
48 addition, characteristics of the urban environment, including high cover of impervious surfaces  
49 and the urban heat island effect, can locally exacerbate climatic extremes<sup>24</sup>. Species mortality  
50 in cities, therefore, can have environmental and socio-economic consequences for local  
51 governments and urban residents<sup>23,25</sup>. For instance, a study of urban areas in the USA  
52 estimated that a decrease of 1% in urban tree cover may represent economic losses of USD  
53 ~\$100 million per year due to the associated loss of air pollution control and carbon  
54 sequestration, and increased energy consumption and power plant emissions<sup>20</sup>.  
55

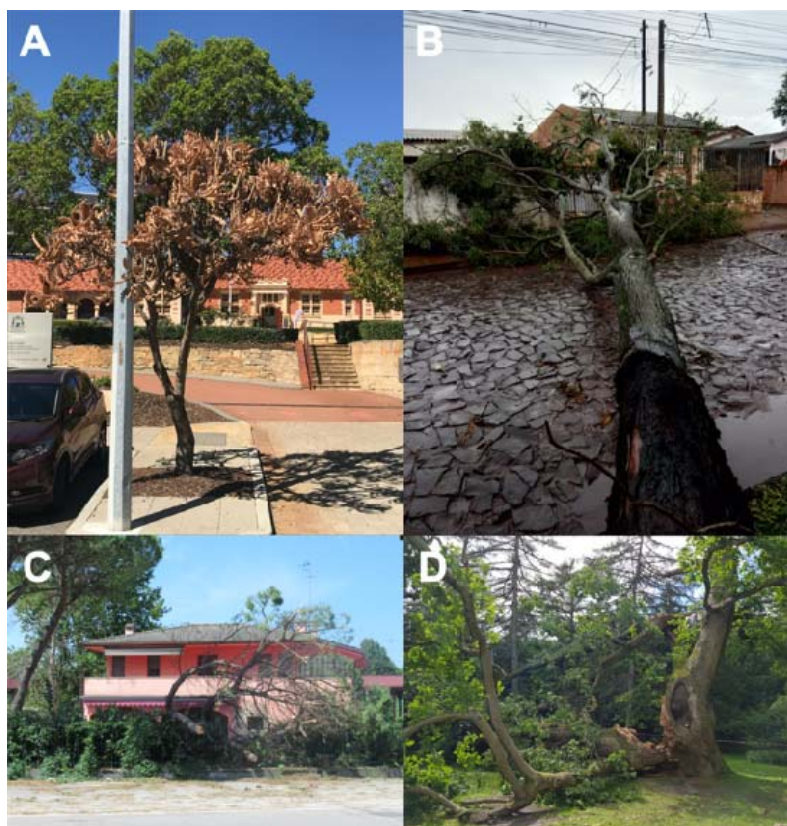

56  
57 **Figure 1.** Examples of urban tree mortality as a result of extreme weather events globally: (a) *Banksia* spp.  
58 dieback after an extreme heat and drought event in Perth, Australia; (b) tree uprooted by wind and storm in Foz  
59 do Iguaçu, Brazil; (c) tree damage associated with a cyclone in Padua, Italy; and (d) storm damage to an oak  
60 tree in Alnarp, Sweden. Photos provided by MER, Evaldo Monteiro Guimarães, Alessio Russo and Johan  
61 Östberg.

62           Strategically, given the slow growth rates of trees and the importance of promoting  
63 tree longevity, successful urban greening involving targeted increases in tree canopy cover  
64 must be planned with future climatic conditions in mind for the next decades to secure the  
65 persistence of urban forests into the future. Urban greening is in part directed towards the  
66 strategic delivery of ecosystem services and benefits<sup>26</sup>. Global estimates of the value of urban  
67 forests exceed USD \$500,000,000 per annum, as the sum of the services urban forests provide  
68 to society<sup>27</sup>. To deliver these services effectively in the long term, it is crucial to identify  
69 vulnerable species and quantify their risk of mortality under future climates. Policymakers and  
70 urban forest managers require to optimise the use of resources and minimise losses when  
71 investing in urban forestry programs<sup>25</sup>. Identifying species and cities most at risk from climate  
72 change is crucial for ensuring urban forests are made resilient in the long term.

73           Here, we present a climate-risk analysis for global urban forests. We assessed the  
74 potential impacts of future changes in climate for 16,006 vascular plant species from 1,010  
75 cities in 93 countries (**Figure 2**). To do so, we calculated three metrics: (1) exposure, the  
76 magnitude of projected changes in temperature and precipitation (assessed using the 5<sup>th</sup> and  
77 95<sup>th</sup> percentiles of temperature and precipitation variables, respectively; see details in  
78 Methods) at each city; (2) safety margin, the sensitivity of each species to changes in climate  
79 according to its climatic tolerance; and (3) risk, calculated as the difference between exposure  
80 and safety margin<sup>4,6</sup>. We calculated a species' climatic tolerance from its current geographical  
81 distribution, while its climate risk was determined by the projected future climate in cities  
82 where the species is currently planted and growing. Because of the mismatch and asynchrony  
83 between the speed at which contemporary climate change is happening and the time required  
84 for long-lived plant species (e.g. trees and shrubs) to respond to climate change<sup>28,29</sup>, aka the  
85 climatic debt<sup>30</sup>, we assume that a significant proportion of species in urban areas are already at  
86 risk or partially decoupled from macroclimatic conditions thanks to costly management  
87 practices (e.g. water supply). Hence, contemporary urban planning and species selection  
88 require to ensure a successful climate mitigation strategy for the future.

89  
90

91 **Results**

92 **Exposure**

93 Exposure (*E*) measures the magnitude of change in climate conditions in a given city between  
94 current (baseline average during 1979-2013) and future (2050 or 2070) climatic conditions.  
95 Under the Representative Concentration Pathway (RCP) 6.0 (for RCP 4.5, see **Table S1; Figure**  
96 **S1**) and according to an ensemble of 10 General Circulation Models (GCMs; see details in  
97 Methods), mean annual temperature (MAT) across all 1,010 cities in this study is predicted to  
98 increase by an average of 2.3°C (standard deviation  $\pm$  0.6°C) by 2050. The greatest increases  
99 are predicted to occur in cities at higher latitudes in the Northern Hemisphere. The increase in  
100 MAT is predicted to exceed 3°C for 126 cities (**Figure 2**). By 2070, average MAT is predicted to  
101 be 3.2°C ( $\pm$  0.9°C) warmer than baseline conditions under the same RCP and set of GCMs, with  
102 570 cities predicted to experience >3°C of warming. For annual precipitation (AP), 820 cities are  
103 predicted to become drier in 2050 with declines averaging -68 mm ( $\pm$  68.4 mm). By 2070, AP  
104 declines -81.7 mm ( $\pm$  74.7 mm) in 805 cities (**Table S1; Figure S2**). See supplemental material  
105 for details on changes (i.e. exposure) of the maximum temperature of the warmest month  
106 (MTWM) and precipitation of the driest quarter (PDQ).

107

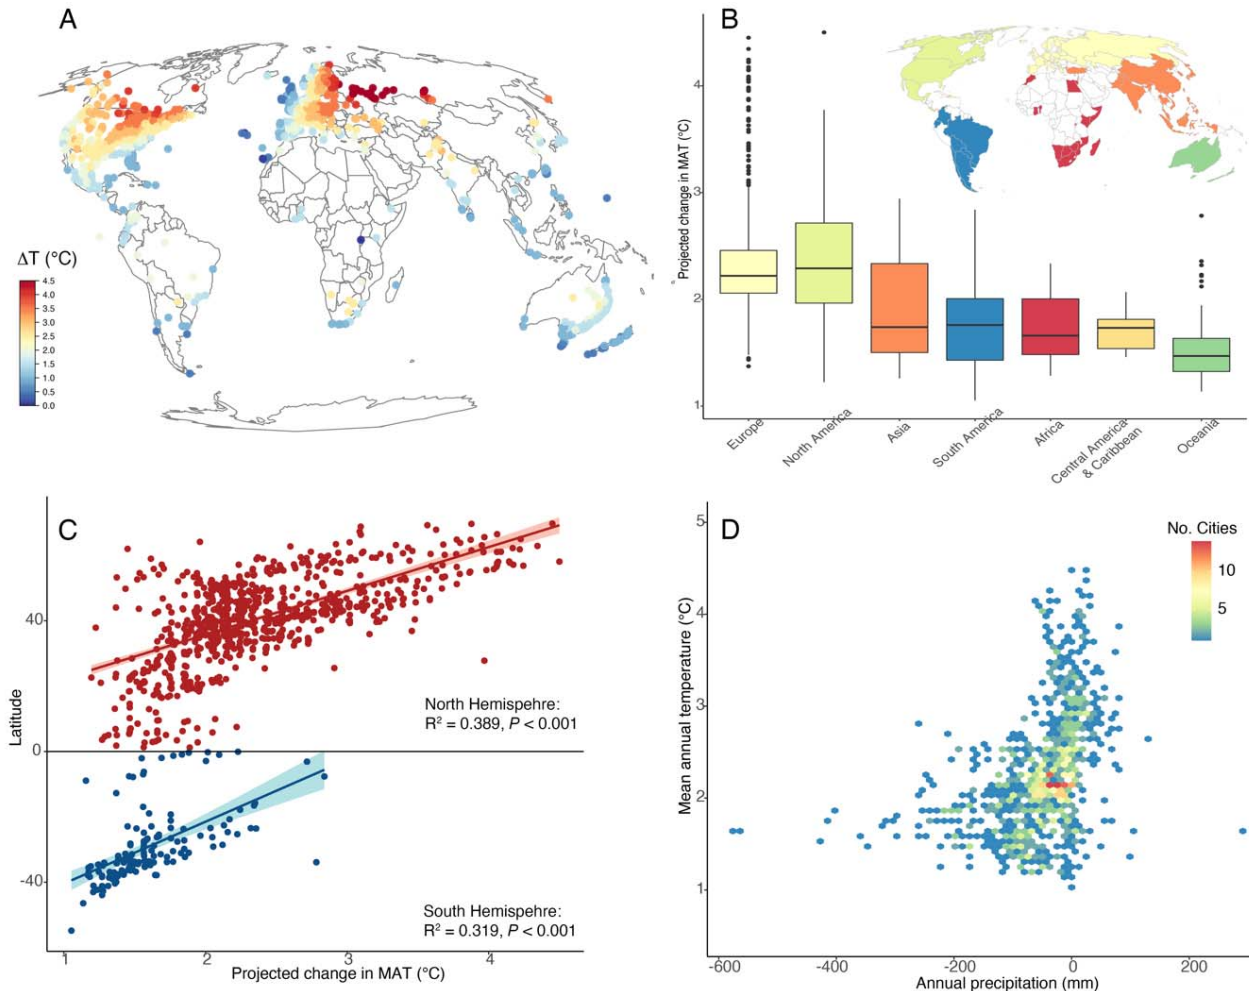

108  
109 **Figure 2. Exposure to climate change across the world's cities.** Exposure of 1,010 cities to changes in  
110 mean annual temperature by 2050 (MAT; A) and boxplot of changes in MAT in seven geographical regions  
111 (**Appendix 1**; B); exposure to temperature change across the latitudinal gradient of cities in the Northern  
112 and Southern Hemisphere with 95% confidence interval for predictions from a linear model ["lm"] (C); and  
113 the interaction between exposure to changes in MAT and annual precipitation (mm) in 2050 (D). All plots  
114 display data for RCP 6.0.

115

### 116 Safety margin

117 The safety margin (*S*) describes a species' potential tolerance to changing climate conditions  
118 within a given city. For each climate variable (i.e. MAT, AP, MTWM, PDQ), *S* is calculated under  
119 current climate as the difference between the value of that variable for the city and the species'  
120 tolerance limit for that variable, estimated as the 5<sup>th</sup> percentile for precipitation and 95<sup>th</sup>

121 percentile for temperature across the entire geographic range of the species (**Figure S3**). We  
122 note that the realised niches for many species are likely underestimating their resilience to  
123 climate change given our data comes from occurrence records (see details in Methods), where  
124 biotic interactions may restrict the realised niche limits and/or sampling bias may affect  
125 estimates. Species may indeed tolerate hotter or drier condition than what they experience in  
126 the field.

127 The safety margin indicates how much warmer (or drier), a city could become in the  
128 future before a species currently planted within the city exceeds the limits of its realised  
129 climatic niche<sup>4,6</sup>. However, it is possible that some species are already at risk under current  
130 climatic conditions with today's temperature being already warmer or precipitation lower than  
131 the threshold the focal species can withstand (**Figure S3**). We found that 9,676 species (60.5%)  
132 are presently exceeding their MAT safety margin (i.e. "unsafe") in at least one city where they  
133 are planted (**Figure S4**). Three cities were identified as currently having 100% of their species  
134 exceeding their MAT safety margin (Chennai and Pondicherry, India; Manila, Philippines).  
135 Furthermore, 86 cities were identified as having >50% of their species exceeding their MAT  
136 safety margin (**Figure S5**).

137 For AP, 8,344 species (52.1%) are already exceeding their AP safety margin in at least  
138 one city where they are planted. Three cities were identified as having 100% of their species  
139 exceeding their AP safety margin (Ankara, Turkey; Gilgit and Quetta, Pakistan), while 89 cities  
140 had >50% of their species currently exceeding their AP safety margin (**Figure S5**). See  
141 supplemental material for details on species' safety margin of MTWM and PDQ.

142

### 143 **Risk**

144 Risk ( $R$ ) to urban forests under future climates is defined as the difference between the city's  
145 exposure to future climate change and its species' current safety margin ( $R = E - S$ )<sup>6</sup>. By 2050,  
146 we found that increasing MAT under RCP 6.0 may result in 13,479 species (84.2%) being at risk  
147 (i.e. city's future climate will exceed the realised climatic tolerance of species;  $S: R > 0$ ) in at  
148 least one city where they are currently planted (for RCP 4.5, see **Figure S6**). Although most  
149 cities threatened by future increases in MAT are concentrated in the USA (320 cities), Australia



150 (86 cities), Mexico (46 cities), Germany (45 cities), France (43 cities), the UK (43 cities) and  
151 Canada (35 cities), we found a tendency for the risk to increase towards the Equator (**Figures 3-**  
152 **4**). For a subset of 37 cities, the exposure level is predicted to be so high under future  
153 conditions (by 2050, RCP 6.0) that it will represent a risk to all (100%) of the recorded species  
154 that currently occur in these cities. By 2070, 14,209 species (88.8%) are predicted to become at  
155 risk (**Figure S6**), with 51 and 602 cities predicted to have 100% and >50% of their species at  
156 risk, respectively.

157

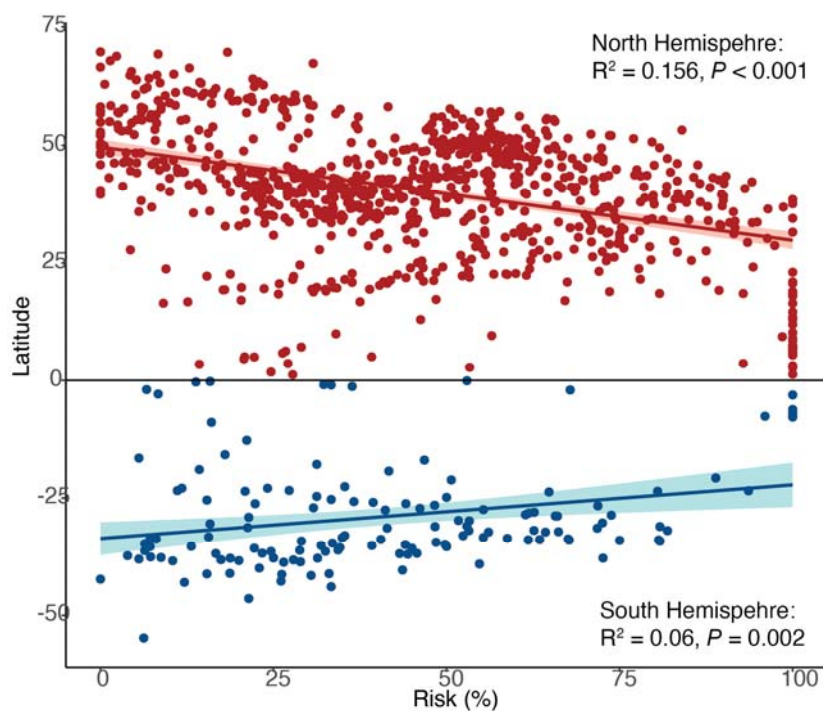

158  
159 **Figure 3** Relationship between risk and latitude ( $n = 870$  cities in the northern hemisphere and 140 in the  
160 southern hemisphere). Ribbons indicate the 95% confidence interval for predictions from a linear model  
161 [“lm”]. Each point represents the mean risk for all species in a given city based on MAT exposure and safety  
162 margin. Data for 2050 and RCP6.0.

163  
164 Under future AP conditions, 9,960 species (62.2%) are predicted to be at risk (i.e. drier  
165 conditions than the focal species’ realised niche limit) in at least one city where they are  
166 currently planted. We identified five and 136 cities with 100% and >50% of their species at risk,  
167 with the highest concentrations of cities found in the USA (257 cities), Australia (77 cities),  
168 Mexico (42 cities), Germany (37 cities), France (32 cities), Russia (30 cities) and the UK (30 cities)

169 (Figure 4). By 2070, 10,233 species (64%) are predicted to become at risk of decreases in AP,  
170 with five and 151 cities having 100% and >50% of their species at risk, respectively. See  
171 supplemental material for details on species' risk of MTWM and PDO and Figures S7-S11.  
172

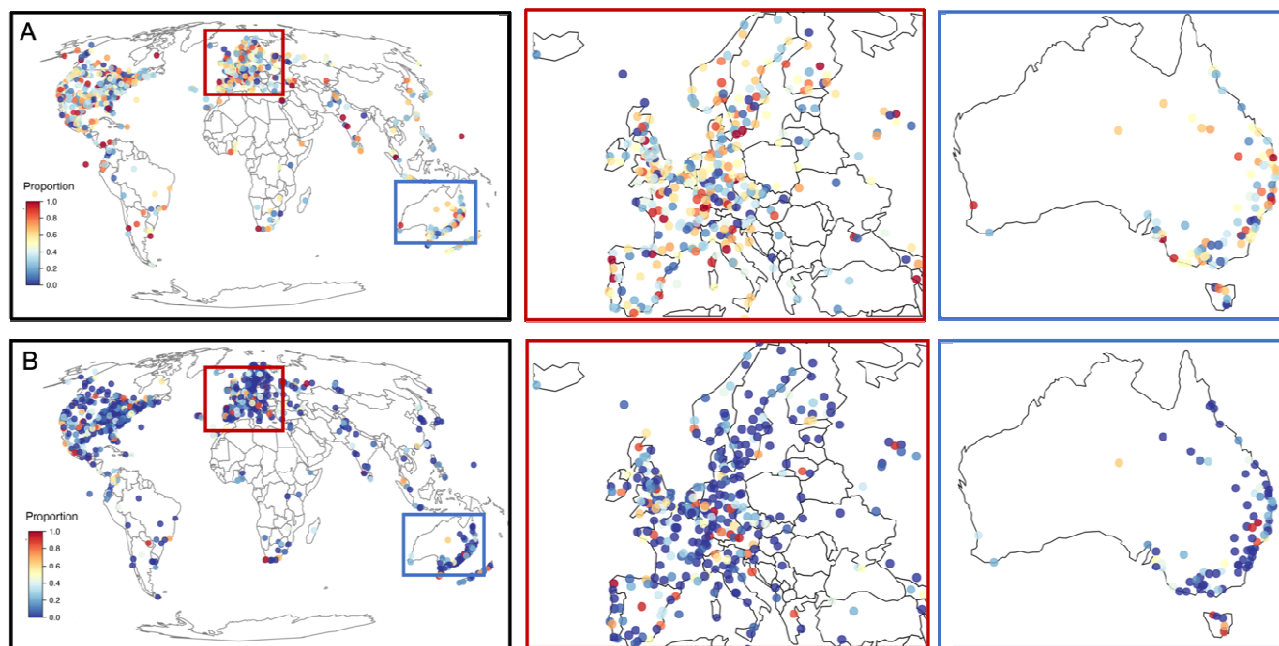

173  
174 **Figure 4.** Proportion of urban forest species in each city predicted to be at risk from projected changes in  
175 mean annual temperature (A; MAT) and annual precipitation (B; AP). Data for 2050 and RCP6.0.  
176

## 177 Discussion

178 We show that 1,010 and 820 cities are at risk from MAT and AP change by 2050. Climate-driven  
179 changes to urban forests will have adverse consequences for city dwellers and governments  
180 globally, although the magnitude of these consequences will vary across cities. Cities predicted  
181 to have higher increases in MAT (>4 °C) are more vulnerable to climate change. Further, cities'  
182 vulnerability can be exacerbated by the urban heat island effect and population size<sup>31</sup>.

183 Changes in precipitation patterns, which are likely to shape species' growth and  
184 survival, will also impact urban forests globally. In general, urban forests that experience  
185 declines in precipitation will be more vulnerable than those facing higher rainfall, although  
186 significant increases in AP might also represent a risk factor, i.e. flooding<sup>32</sup>. Human  
187 management such as irrigation or stormwater capture can aid at mitigating the adverse effects

188 of low precipitation by providing supplemental water during periods of severe climate stress<sup>33</sup>  
189 and promoting evapotranspiration (local cooling effect generated by plants), which will be  
190 crucial to mitigate future heatwaves in cities<sup>34</sup>. Irrigation, nonetheless, may not be a  
191 sustainable solution in many places where water is increasingly scarce<sup>35,36</sup>. This type of costly  
192 management practices may actually explain why so many species are already exceeding their  
193 current AP safety margins.

194 Urban forests are often water stressed or closely coupled to regional precipitation and  
195 water balance; hence, species growing under hydrologically stressful conditions are more  
196 vulnerable to extreme climate events<sup>14</sup>, resulting in higher mortality rates<sup>37</sup>. Unfortunately,  
197 studies of urban species mortality driven by climate change are rare and, generally, anecdotal  
198 and limited in scope and broad applicability<sup>38</sup>, which limits the capacity to assess climate risk  
199 for those species that are currently experiencing conditions that exceed their safety margins<sup>4</sup>.  
200 However, our results show that some cities currently harbor many species living outside of  
201 their realised climatic tolerance. We found a high number of species currently exceeding their  
202 safety margin for the four climate variables (MAT = 60.5%; AP = 52.1%; MTWM = 56.3%; PDQ =  
203 46.8%), suggesting there are additional management actions (e.g. irrigation) and biological  
204 factors facilitating species' presence in cities and decoupling them from macroclimatic  
205 fluctuations. Being planted in an area, however, does not necessarily mean that a species is  
206 performing well in that location. There is also a difference between being able to tolerate and  
207 persist in certain conditions and being able to maintain a function. That is, species whose  
208 safety margins are exceeded may be able to tolerate, but would not have the capacity to  
209 function and remain healthy under those conditions. The long-term stability of urban forests,  
210 therefore, depends on the identification of species and cultivars that are resilient to long-term  
211 climate change in a given location and are able to thrive and survive<sup>39</sup>.

212 By 2050, the number of species at risk is predicted to increase for all climate variables  
213 except for AP, where predicted rainfall increases in some cities might ameliorate the impacts  
214 of climate change. However, seasonal decreases in rainfall (i.e. PDQ) increase the risk that a  
215 given species experiences conditions that are drier than it can tolerate – as indicated by its  
216 safety margin. Further, global warming increases risk in cities toward lower latitudes (**Figure**

217 3), where resources to mitigate climate change are more limited<sup>40</sup>. In these cities, MAT  
218 exposure is lower (particularly in the Northern hemisphere) compare to cities at higher  
219 latitudes; therefore, species' safety margin might be driving the increase in risk. This highlights  
220 a potential mismatch between species selection in those cities and the changing climatic  
221 conditions that have occurred during over last decades (i.e. baseline 1970-2013).

222 We also found 12,653 (79.1%) species at risk from increases in MTWM, highlighting that  
223 extreme temperatures represent a significant threat to urban forests, especially towards lower  
224 latitudes. Predicted changes in extreme/seasonal variables (i.e. MTWM, PDQ), therefore,  
225 impose a thermal/hydrological stress to plant species, as well as human populations. Our risk  
226 approach allows identification of the most vulnerable urban plant species<sup>46</sup>. Although here we  
227 described risk in a binary manner (i.e. high/low risk), our risk estimation can provide details on  
228 which species are more at risk of changes in climate (**Figure S12**) and can guide prioritization  
229 and substitution for more resilient species.

230 Climate change will become a key driver of species mortality in urban forests<sup>44</sup>. Likely,  
231 it will become increasingly more difficult to mitigate the effects of climate change through  
232 management actions, such as irrigation, to offset soil water deficits, particularly under limited  
233 urban water supply. Additionally, management options for altering or mitigating rising  
234 temperatures, particularly maxima and minima, are limited<sup>41</sup>. Furthermore, vulnerable species  
235 will require more intensive and costly management actions and in extreme cases, replacement,  
236 if they cannot cope with climate change. Our results, therefore, provide a path forward to  
237 better inform local governments of potential risks and improve species selection given future  
238 climates, to avoid planting failures and maximise societal benefits in a future warmer world.  
239 However, the mitigation of climate change impacts ultimately will depend on the available  
240 resources of each city and its capacity to respond and cope with climatic changes as they  
241 occur.

242 To improve species selection in relation to climate, however, requires studies of realised  
243 niche matching (i.e. species' niche with city's climate), physiological plasticity and  
244 environmental tolerance of urban species and cultivars. Selection of resilient species should be  
245 based on life history and physiological information. Currently, these data are limited, which

246 increases uncertainty around decision-making<sup>42</sup>. To maintain healthy urban forests in a  
247 changing climate, it will be necessary to address budget considerations, the provision of  
248 adequate time and effort for establishing and maintaining urban plantings, and filling the  
249 knowledge gaps in appropriate species selection for changing climatic conditions. We  
250 emphasize the importance of taking immediate actions to secure the survival and persistence  
251 of urban forests globally and avoid the collapse of these socio-ecosystems.

252

## 253 **Methods**

### 254 **Urban forest composition and urban areas**

255 Although urban forests are mainly defined as systems comprising trees<sup>43</sup>, this definition  
256 excludes the ecosystem services provided by other plants' growth forms. Therefore, we  
257 adopted a broader definition, which considers an urban forest as all vegetation (i.e.  
258 tracheophytes: vascular plants) present in urban parks, woodland, abandoned sites, residential  
259 areas, private gardens and along urban streets (sensu<sup>8</sup>).

260 We obtained occurrence records globally for all tracheophytes from the Global  
261 Biodiversity Information Facility (i.e. 181,914,869 records from 3,949 published datasets)  
262 (GBIF.org; 18 December 2019 GBIF Occurrence Download <https://doi.org/10.15468/dl.cpwlwc>).  
263 We only retained occurrence records with sufficient information on geographical coordinates.  
264 Additionally, occurrence records were filtered and cleaned by removing spatially invalid or  
265 suspect records that could lead to miscalculation of species' climate niches and duplicate  
266 records using the CoordinateCleaner package<sup>44</sup> in R version 4.0.5<sup>45</sup>. Finally, in order to refine  
267 the list of species to be included in the subsequent analyses, we removed all species with no  
268 occurrence records located inside the geographical boundaries of urban areas (see below). This  
269 resulted in 23,857,682 valid occurrence records, from 16,006 species within 342 families. The  
270 average number of species per family was 48 ( $\pm 148$  species), with a maximum of 1,860 species  
271 in Asteraceae, while 64 families were represented by a single species. Taxonomy was  
272 standardized and verified against GBIF and then against The Plant List (TPL;  
273 [www.theplantlist.org](http://www.theplantlist.org)) using Taxonstand, taxize, and taxizehelper packages<sup>46-48</sup> in R<sup>45</sup>.

274 Polygons defining the boundaries of 6,018 urban areas (i.e. cities) globally were  
275 obtained from Kelso and Patterson <sup>49</sup> as a shapefile (WGS84; 1:10 million; EPSG:4326). These  
276 data were projected to the Mollweide projection, an equal-area pseudocylindrical map  
277 projection (ESRI:54009).

278 We assessed the effect of potentially inadequate sampling on our analyses by  
279 estimating the completeness of the species inventory in each city (see details in **Supplemental**  
280 **Material**). Based on this analysis, we retained 1,010 cities from 93 countries with high  
281 completeness (>0.20). The average number of cities within countries was 11 ( $\pm$  35 cities), with a  
282 maximum of 324 in the USA, while 44 countries were represented by a single city. The average  
283 number of species per city was 217 ( $\pm$  294 species), with a maximum of 2,249 in Brussels  
284 (Belgium) and a minimum of 11 species in ten cities from Albania and Palestine (**Figures S13-**  
285 **S14**).

286

#### 287 **Climate data**

288 Baseline and future climate data were obtained from CHELSA Version 1.2 (climatologies at  
289 high resolution for the earth's land surface areas<sup>50</sup>) at a spatial resolution of 30 arc-seconds ( $\sim$ 1  
290 km at the equator). A detailed description of the generation of these data is given elsewhere<sup>50</sup>.  
291 We selected four climate variables; two of them describing mean conditions: (1) mean annual  
292 temperature (MAT) and (2) annual precipitation (AP), and two variables describing extremes of  
293 climate: (3) maximum temperature of the warmest month (MTWM) and (4) precipitation of the  
294 driest quarter (PDO) (**Table S2**). All climate data were projected to the Mollweide projection  
295 system (ESRI:54009) at a 1 km resolution using bilinear interpolation. Baseline data represent  
296 climate conditions during the period 1979-2013.

297 For future climate data, we downloaded projections for 10 General Circulation Models  
298 (GCMs): (1) bcc-csm1-1, China; (2) CCSM4, USA; (3) CESM1-CAM5, USA; (4) CSIRO-Mk3-6-0,  
299 Australia; (5) GFDL-CM3, USA; (6) HadGEM2-AO, Korea; (7) IPSL-CM5A-MR, France; (8)  
300 MIROC-ESM-CHEM, Japan; (9) MIROC5, Japan; and (10) NorESM1-M, Norway (**Table S3**). We  
301 used median values across all 10 GCMs for all our analyses. By selecting multiple GCMs, we  
302 aimed to capture the uncertainty and variability around future climate scenarios. We selected

303 two time periods 2050 (average for 2041-2060) and 2070 (average for 2061-2080), and two  
304 Representative Concentration Pathways (RCP) 4.5 and 6.0, which project a peak in emissions  
305 around 2040 and 2080, respectively, followed by a decline<sup>51</sup>. Of all GCMs, CSIRO-Mk3-6-0  
306 showed the greatest variability for AP and PDQ (**Figure S15**).

307

### 308 **Species' climate niche and cities' climate**

309 For the 16,006 species identified as being planted in urban areas, we used all occurrence  
310 records (i.e. within and outside urban areas) to extract values of the aforementioned climate  
311 variables to characterise species' realised climate niches under baseline climatic conditions (i.e.  
312 1979-2013). For each city, we placed a grid (1 x 1 km) over its area and extracted the values of  
313 all four variables at each cell for both current and future climates.

314 Then, for all species and cities, we estimated the upper and lower limits of the  
315 temperature and precipitation variables, respectively, based on all occurrence records (i.e.  
316 within and outside urban areas) for each species and based on all grid cells of each city. We  
317 used the upper and lower bounds of the distribution of values across the species range to  
318 determine whether cities are likely to exceed species' limits. For this, we selected the threshold  
319 of the 95<sup>th</sup> percentile of MAT/MTWM and the 5<sup>th</sup> percentile of AP/PDQ. We used these  
320 thresholds to assess the extremes of these variables as indicative of niche tolerance (i.e.  
321 species' thermal and drought stress tolerance for survival and growth)<sup>4</sup>. All throughout the  
322 manuscript, when referring to these climate variables, we imply the use of the 95<sup>th</sup>  
323 (MAT/MTWM) and 5<sup>th</sup> (AP/PDQ) percentiles, accordingly (**Figure S3**).

324

### 325 **Climate change vulnerability metrics**

326 We selected three climate change vulnerability metrics for our analysis: exposure, safety  
327 margin and risk<sup>6,52</sup>. These metrics were calculated for all four climate variables, time periods  
328 (baseline and future [2050 and 2070]) and RCPs (4.5 and 6.0).

329 Exposure (*E*) is a measure of how much the climate is projected to change (e.g. warmer  
330 or drier) between current and future climatic conditions; thus, it is estimated as the difference  
331 between the city's future and baseline (i.e. current) climate as follow:

332

$$E = City_{FutureClimate} - City_{BaselineClimate}$$

333

334 A positive exposure ( $E > 0$ ) indicates that warmer (or wetter) conditions are expected  
335 under future climate change scenarios.

336 The safety margin ( $S$ ) indicates how much warmer (or drier), a city could become before  
337 the realised climate niche of its species have been exceeded, and was estimated as follows:

338

$$S = \begin{cases} Species_{ClimateVariable[i]} - City_{BaselineClimate} & (MAT, MTWM) \\ City_{BaselineClimate} - Species_{ClimateVariable[i]} & (AP, PDQ) \end{cases}$$

339

340 For  $S$ , a species' climatic limit ( $Species_{ClimateVariable[i]}$ ) was measured as the 95<sup>th</sup>  
341 (MAT/MTWM) and the 5<sup>th</sup> (AP/PDQ) percentiles of the species' climate niche based on its  
342 global occurrence records and baseline climatic conditions. The difference between  
343  $Species_{ClimateVariable[i]}$  and the long-term average climatic conditions experienced in the focal city  
344 (i.e.  $City_{BaselineClimate}$ ) is calculated as the 'safety margin' ( $S$ ) for each focal species-by-city  
345 combination<sup>4</sup>. That is, a positive safety margin ( $S > 0$ ) indicates that the species has a thermal  
346 tolerance limit which exceeds current baseline temperature conditions in the focal city (e.g.  
347 cooler and thus safe); whereas a negative value ( $S < 0$ ) indicates that the species is  
348 experiencing "unsafe" climatic conditions under the baseline (e.g. warmer than what the  
349 species can actually withstand according to its tolerance limit for temperature) (**Figure S3**).

350 The risk ( $R$ ) is the difference between  $E$  and  $S$ . Thus, if  $R$  is positive ( $R > 0$ ), the exposure  
351 to future climate is greater than the current safety margin for the focal species in a focal city  
352 (i.e. high risk). Yet, if the difference is negative ( $R < 0$ ) then exposure ( $E$ ) to future climate  
353 change is still within the range of values allowed by the safety margin ( $S$ ), thus it is "safe" under  
354 future conditions (i.e. low risk) (**Figure S3**). Risk to climate change ( $R$ ) was estimated as:

355

$$R = \begin{cases} E - S_{(MAT, MTWM)} \\ S - E_{(AP, PDQ)} \end{cases}$$

357



358 Linear regressions were fitted to evaluate the relationship between climate  
359 exposure/risk and cities' latitude. Model performance was evaluated through the calculation of  
360 an  $R^2$  value and the  $F$ -Statistic at a significance level of  $P < 0.05$ . All analyses were conducted  
361 using the statistical software R version 4.0.5<sup>45</sup>. Caveats and limitations to our methodology can  
362 be found in the **Supplementary Materials** and prior studies<sup>4,6</sup>.

363

#### 364 **Data availability**

365 Global occurrence records are available on Global Biodiversity Information Facility (GBIF,  
366 [www.gbif.org](http://www.gbif.org)). Polygons defining the boundaries of 6,018 urban areas (are available on World  
367 Urban Areas (<https://earthworks.stanford.edu/catalog/stanford-yk247bg4748>). Climate data  
368 are available on CHELSA (<https://chelsa-climate.org>).

369

#### 370 **Competing Interests**

371 The authors declare that they have no conflict of interest to disclose.

372

#### 373 **Author contribution**

374 MER, RVG, PDR, SAP and MGT conceived the article. MER, RVG, LJB, PDR, SAP and MGT  
375 designed the research. MER, JBB, JL and BR collected and analysed data. MER wrote the  
376 article. All authors contributed to discussion of the content and reviewed or edited the  
377 manuscript before submission. All authors, except for MER and RVG, are listed alphabetically.

378

#### 379 **References**

- 380 1 Keeler, B. L. *et al.* Social-ecological and technological factors moderate the value of  
381 urban nature. *Nature Sustainability* **2**, 29 (2019).  
382 2 UN. United Nations: The World's cities in 2018. *Department of Economic and Social*  
383 *Affairs, Population Division, World Urbanization Prospects*, 1-34 (2018).  
384 3 Burley, H. *et al.* Substantial declines in urban tree habitat predicted under climate  
385 change. *Science of The Total Environment* **685**, 451-462 (2019).  
386 4 Esperon-Rodriguez, M. *et al.* Assessing the vulnerability of Australia's urban forests to  
387 climate extremes. *Plants, People, Planet* **1**, 1-11, doi:<https://doi.org/10.1002/ppp3.10064>  
388 (2019).  
389 5 Brune, M. Urban trees under climate change. Potential Impacts of Dry Spells and Heat  
390 Waves in Three German Regions in the 2050s., 129 ( Hamburg. Rep, 2016).

- 391 6 Gallagher, R. V., Allen, S. & Wright, I. J. Safety margins and adaptive capacity of  
392 vegetation to climate change. *Scientific Reports* **9**, 8241 (2019).
- 393 7 Liu, Z., He, C., Zhou, Y. & Wu, J. How much of the world's land has been urbanized,  
394 really? A hierarchical framework for avoiding confusion. *Landscape Ecology* **29**, 763-771  
395 (2014).
- 396 8 Alvey, A. A. Promoting and preserving biodiversity in the urban forest. *Urban Forestry &*  
397 *Urban Greening* **5**, 195-201 (2006).
- 398 9 Venter, Z. S., Barton, D. N., Gundersen, V., Figari, H. & Nowell, M. Urban nature in a  
399 time of crisis: recreational use of green space increases during the COVID-19 outbreak  
400 in Oslo, Norway. *Environmental Research Letters* **15**, 104075 (2020).
- 401 10 Steffen, W., Broadgate, W., Deutsch, L., Gaffney, O. & Ludwig, C. The trajectory of the  
402 Anthropocene: the great acceleration. *The Anthropocene Review* **2**, 81-98 (2015).
- 403 11 Hoegh-Guldberg, O. & Bruno, J. F. The impact of climate change on the world's marine  
404 ecosystems. *Science* **328**, 1523-1528 (2010).
- 405 12 Scholze, M., Knorr, W., Arnell, N. W. & Prentice, I. C. A climate-change risk analysis for  
406 world ecosystems. *Proceedings of the National Academy of Sciences* **103**, 13116-13120  
407 (2006).
- 408 13 Lenoir, J. *et al.* Species better track climate warming in the oceans than on land. *Nature*  
409 *Ecology & Evolution* **4**, 1044–1059 (2020).
- 410 14 Ordóñez, C. & Duinker, P. Assessing the vulnerability of urban forests to climate change.  
411 *Environmental Reviews* **22**, 311-321 (2014).
- 412 15 Brandt, L. *et al.* A framework for adapting urban forests to climate change.  
413 *Environmental Science & Policy* **66**, 393-402 (2016).
- 414 16 Petri, A. C., Koeser, A. K., Lovell, S. T. & Ingram, D. How green are trees?—Using life  
415 cycle assessment methods to assess net environmental benefits. *Journal of*  
416 *Environmental Horticulture* **34**, 101-110 (2016).
- 417 17 Bastin, J.-F. *et al.* The global tree restoration potential. *Science* **365**, 76-79 (2019).
- 418 18 IPCC. Global warming of 1.5°C. (Intergovernmental Panel on Climate Change,  
419 Switzerland, 2018).
- 420 19 Van Mantgem, P. J. *et al.* Widespread increase of tree mortality rates in the western  
421 United States. *Science* **323**, 521-524 (2009).
- 422 20 Nowak, D. J. & Greenfield, E. J. Declining urban and community tree cover in the United  
423 States. *Urban forestry & Urban Greening* **32**, 32-55 (2018).
- 424 21 Easterling, D. R. *et al.* Climate extremes: observations, modeling, and impacts. *Science*  
425 **289**, 2068-2074 (2000).
- 426 22 Zscheischler, J. *et al.* Future climate risk from compound events. *Nature Climate*  
427 *Change* **8**, 469–477 (2018).
- 428 23 Yan, P. & Yang, J. Performances of Urban Tree Species under Disturbances in 120  
429 Cities in China. *Forests* **9**, 50 (2018).
- 430 24 Leal Filho, W., Icaza, L. E., Neht, A., Klavins, M. & Morgan, E. A. Coping with the  
431 impacts of urban heat islands. A literature based study on understanding urban heat  
432 vulnerability and the need for resilience in cities in a global climate change context.  
433 *Journal of Cleaner Production* **171**, 1140-1149 (2018).
- 434 25 Hilbert, D., Roman, L., Koeser, A. K., Vogt, J. & Van Doorn, N. S. Urban Tree Mortality:  
435 A Literature Review. *Arboriculture & Urban Forestry* **45**, 167-200 (2019).
- 436 26 Young, R. F. & McPherson, E. G. Governing metropolitan green infrastructure in the  
437 United States. *Landscape and Urban Planning* **109**, 67-75 (2013).
- 438 27 Endreny, T. *et al.* Implementing and managing urban forests: A much needed  
439 conservation strategy to increase ecosystem services and urban wellbeing. *Ecological*  
440 *Modelling* **360**, 328-335 (2017).

- 441 28 Bertrand, R. *et al.* Changes in plant community composition lag behind climate warming  
442 in lowland forests. *Nature* **479**, 517-520 (2011).
- 443 29 Bertrand, R. *et al.* Ecological constraints increase the climatic debt in forests. *Nature*  
444 *Communications* **7**, 1-10 (2016).
- 445 30 Richard, B. *et al.* The climatic debt is growing in the understory of temperate forests:  
446 stand characteristics matter. *Global Ecology and Biogeography* **Accepted** (2021).
- 447 31 Manoli, G. *et al.* Magnitude of urban heat islands largely explained by climate and  
448 population. *Nature* **573**, 55-60 (2019).
- 449 32 Hirabayashi, Y., Kanae, S., Emori, S., Oki, T. & Kimoto, M. Global projections of  
450 changing risks of floods and droughts in a changing climate. *Hydrological Sciences*  
451 *Journal* **53**, 754-772 (2008).
- 452 33 Van der Veken, S., Hermy, M., Vellend, M., Knapen, A. & Verheyen, K. Garden plants  
453 get a head start on climate change. *Frontiers in Ecology and the Environment* **6**, 212-  
454 216 (2008).
- 455 34 Ballinas, M. & Barradas, V. L. Transpiration and stomatal conductance as potential  
456 mechanisms to mitigate the heat load in Mexico City. *Urban Forestry & Urban Greening*  
457 **20**, 152-159 (2016).
- 458 35 Di Baldassarre, G. *et al.* Water shortages worsened by reservoir effects. *Nature*  
459 *Sustainability* **1**, 617 (2018).
- 460 36 Hoekstra, A. Y. & Mekonnen, M. M. The water footprint of humanity. *Proceedings of the*  
461 *National Academy of Sciences* **109**, 3232-3237 (2012).
- 462 37 Smith, I. A., Dearborn, V. K. & Hutyra, L. R. Live fast, die young: Accelerated growth,  
463 mortality, and turnover in street trees. *PLOS ONE* **14**, e0215846,  
464 doi:10.1371/journal.pone.0215846 (2019).
- 465 38 Esperon-Rodriguez, M. *et al.* Research needed to support urban forests and tree  
466 survival in a changing climate. *Plants People Planet* (In review).
- 467 39 McPherson, E. G., Berry, A. M. & van Doorn, N. S. Performance testing to identify  
468 climate-ready trees. *Urban Forestry & Urban Greening* **29**, 28-39 (2018).
- 469 40 Kumm, M. & Varis, O. The world by latitudes: A global analysis of human population,  
470 development level and environment across the north-south axis over the past half  
471 century. *Applied Geography* **31**, 495-507 (2011).
- 472 41 Norton, B. A. *et al.* Planning for cooler cities: A framework to prioritise green  
473 infrastructure to mitigate high temperatures in urban landscapes. *Landscape and Urban*  
474 *Planning* **134**, 127-138 (2015).
- 475 42 Sjöman, H. & Nielsen, A. B. Selecting trees for urban paved sites in Scandinavia—A  
476 review of information on stress tolerance and its relation to the requirements of tree  
477 planners. *Urban Forestry & Urban Greening* **9**, 281-293 (2010).
- 478 43 FAO. Global forest resources assessment 2015: how are the world's forests changing?  
479 Report No. 9253092831, (New York, 2016).
- 480 44 Zizka, A. *et al.* CoordinateCleaner: Standardized cleaning of occurrence records from  
481 biological collection databases. *Methods in Ecology and Evolution* **10**, 744-751 (2019).
- 482 45 R: A language and environment for statistical computing. R Foundation for Statistical  
483 Computing, Vienna, Austria (2019).
- 484 46 Taxonomic Standardization of Plant Species Names. Package 'Taxonstand' (CRAN:  
485 <https://cran.r-project.org/web/packages/Taxonstand/Taxonstand.pdf>, 2017).
- 486 47 Chamberlain, S. & Szocs, E. (F1000Research, 2:191, URL:  
487 <http://f1000research.com/articles/2-191/v2>., 2013).
- 488 48 Quintans, D. (R package version 0.3.0. URL:  
489 <https://github.com/DesiQuintans/taxizehelper>. DOI: 10.5281/zenodo.1410632., 2018).

- 490 49 Kelso, N. & Patterson, T. World Urban Areas, LandScan, 1:10 million (2012). [Shapefile].  
491 North American Cartographic Information Society. Retrieved from  
492 <https://earthworks.stanford.edu/catalog/stanford-yk247bg4748>. (2012).  
493 50 Karger, D. N. *et al.* Climatologies at high resolution for the earth's land surface areas.  
494 *Scientific Data* **4**, 170122 (2017).  
495 51 Meinshausen, M. *et al.* The RCP greenhouse gas concentrations and their extensions  
496 from 1765 to 2300. *Climatic Change* **109**, 213-241 (2011).  
497 52 Dawson, T. P., Jackson, S. T., House, J. I., Prentice, I. C. & Mace, G. M. Beyond  
498 predictions: biodiversity conservation in a changing climate. *Science* **332**, 53-58 (2011).  
499

## Supplemental Material

### Results

#### Exposure

For MTWM, an average increase of  $1.1^{\circ}\text{C}$  ( $\pm 0.5^{\circ}\text{C}$ ) is predicted across all cities, rising to  $1.9^{\circ}\text{C}$  ( $\pm 0.6^{\circ}\text{C}$ ) by 2070 (**Table S1**). By 2050, the warmest months in four cities (Kiev, Ukraine; Belgorod and Bryansk, Russia; Belgrade, Serbia) are predicted to be  $>3^{\circ}\text{C}$  warmer than baseline conditions (**Figure 1**). By 2070, 384 cities are projected to become  $>3^{\circ}\text{C}$  warmer, with 13 predicted to be  $>4^{\circ}\text{C}$  warmer than the baseline (average 1979-2013). For PDQ, 531 cities are predicted to become drier by 2050 ( $-4.2\text{ mm} \pm 6.7\text{ mm}$ ), and 531 cities will remain drier by 2070 ( $-5.8\text{ mm} \pm 9.3\text{ mm}$ ) (**Figure 2**).

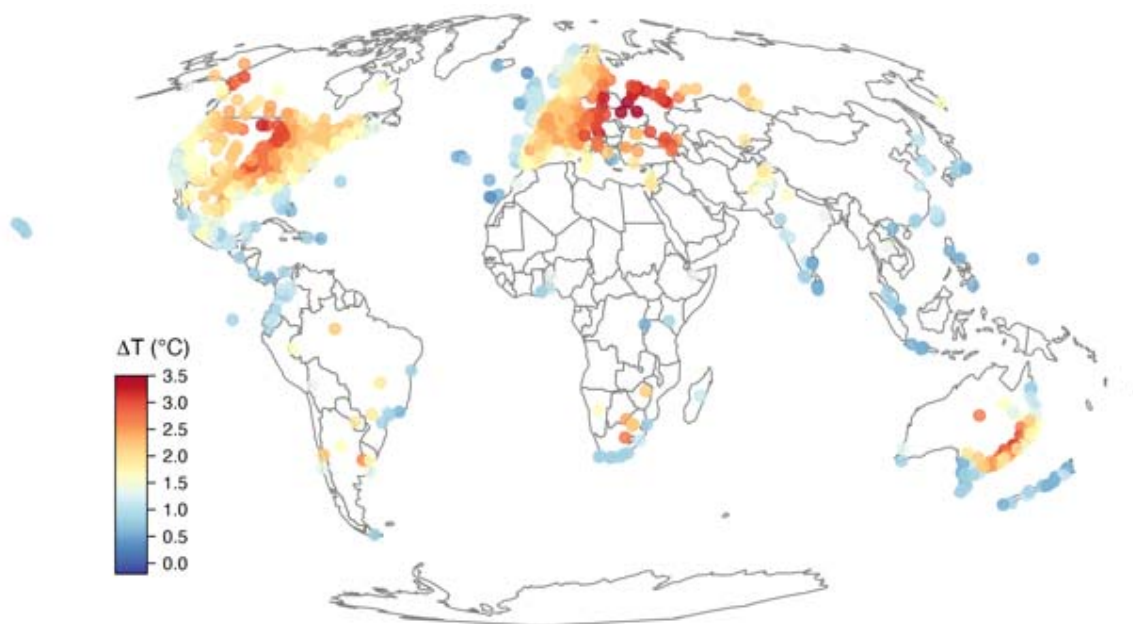

**Figure 1.** Changes (i.e. exposure) in maximum temperature of the warmest month (MTWM) predicted to occur by 2050. Data for RCP6.0.

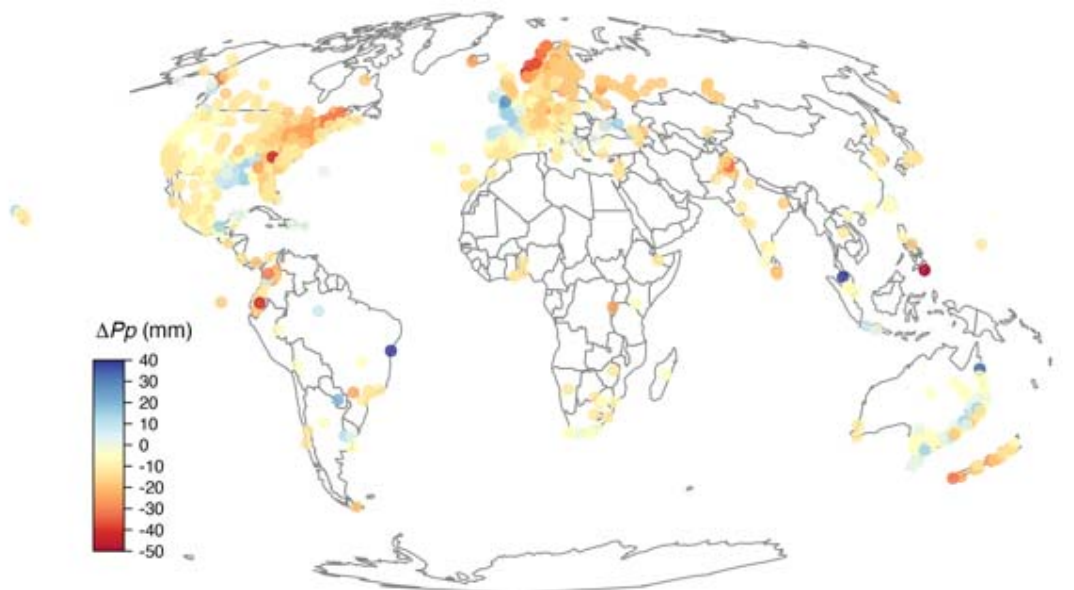

**Figure 2.** Changes (i.e. exposure) in precipitation of the driest quarter (PDQ) predicted to occur by 2050. Data for RCP6.0.

### Safety margin

For MTWM, 9,005 species (56.3%) are exceeding their current MTWM safety margin. One city, Arrecife (Spain), has 100% of species exceeding their safety margin, and 122 cities have >50% of their species exceeding their safety margin (**Figure 3**). For PDQ, 7,487 species (46.8%) are exceeding their PDQ safety margin, in at least one city where they are currently planted, and 123 cities currently have >50% of their species exceeding their PDQ safety margin (**Figure 4**).



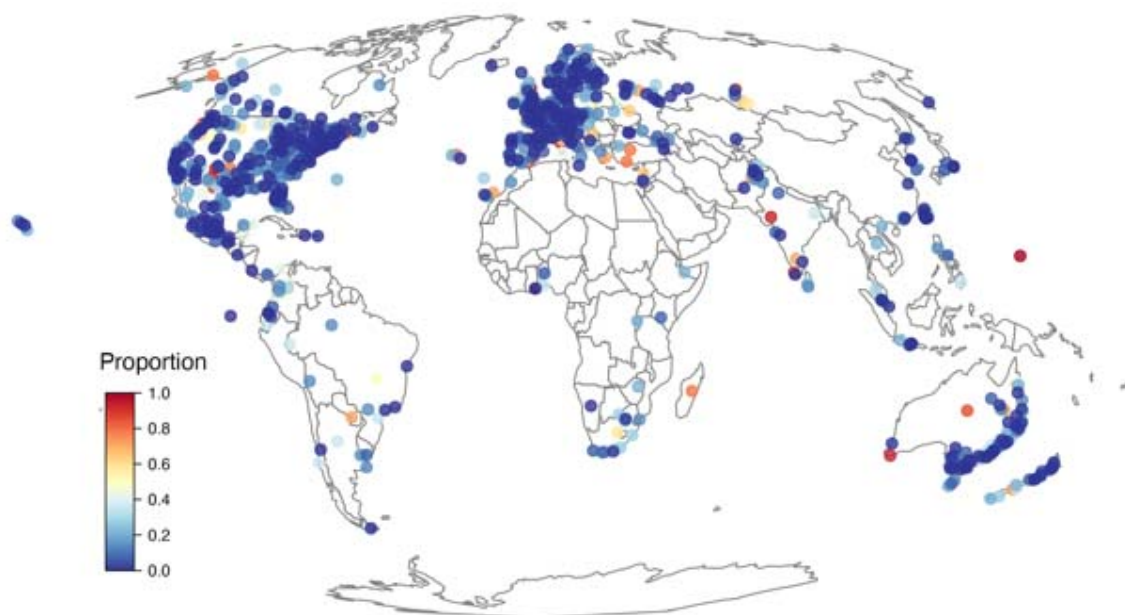

**Figure 3.** Proportion of urban forest species in each city predicted to exceed their maximum temperature of the warmest month (MTWM) safety margin. Data for 2050 and RCP6.0.

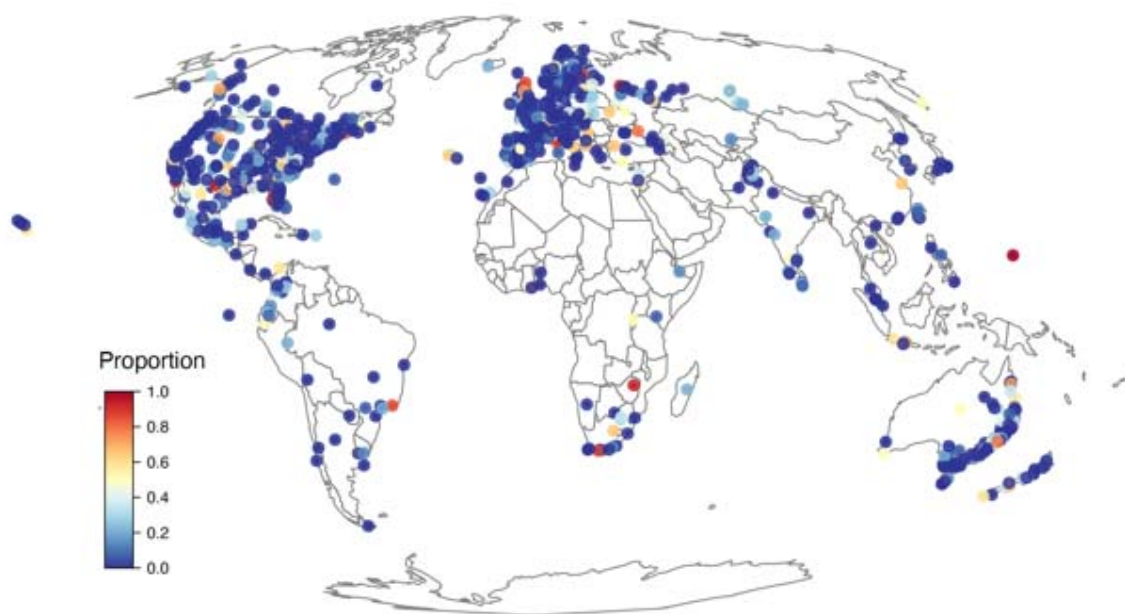

**Figure 4.** Proportion of urban forest species in each city predicted to exceed their precipitation of the driest quarter (PDQ) safety margin. Data for 2050 and RCP6.0.

## Risk

By 2050, for MTWM and PDO, 12,653 (79.1%) and 8,131 (50.8%) species, respectively, are predicted to be at risk from future changes in climate. For MTWM, 14 and 480 cities are predicted to have 100% and >50% of their species at risk. Whereas for PDO, 10 and 131 cities are predicted to have 100% and >50% of their species at risk, respectively (Figures 5-6).

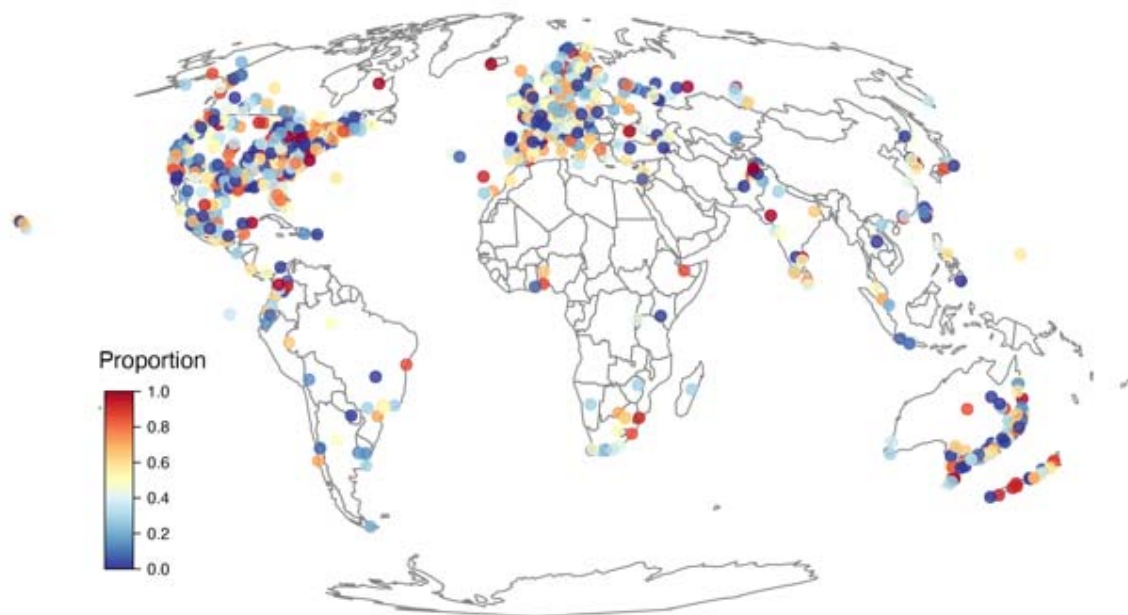

**Figure 5.** Proportion of urban forest species in each city predicted to be at risk from projected changes in maximum temperature of the warmest month (MTWM). Data for 2050 and RCP6.0.



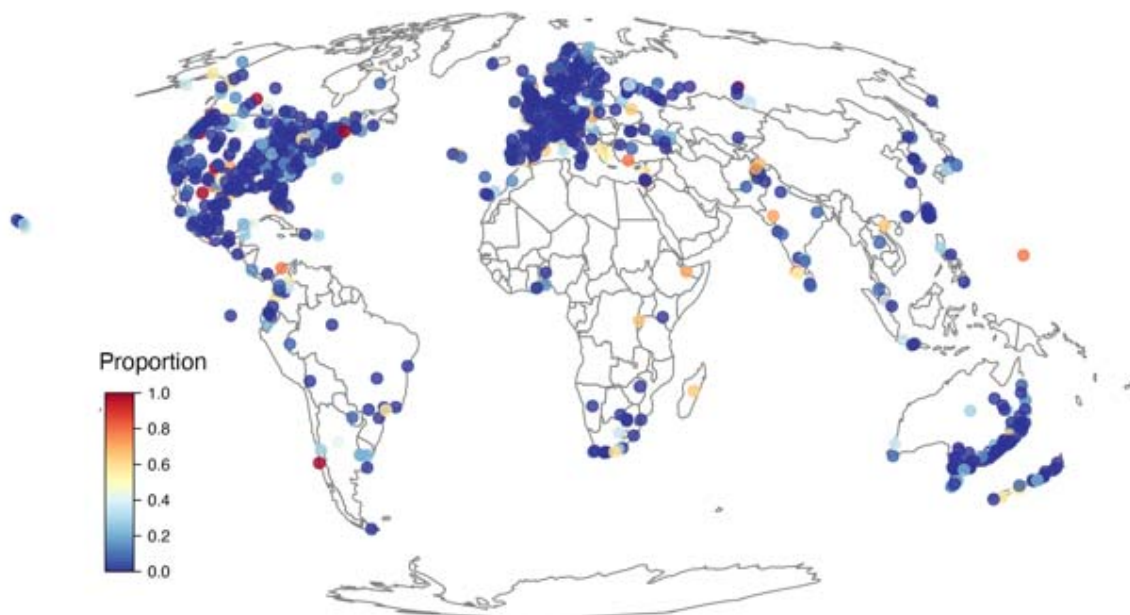

**Figure 6.** Proportion of urban forest species in each city predicted to be at risk from projected changes in driest quarter (PDQ). Data for 2050 and RCP6.0.

## Caveats

### Sampling bias

Sampling effort in herbarium collections largely reflects spatial variation, often related to human settlement and infrastructure<sup>1,2</sup>; hence, the sampling effort across cities is undoubtedly biased. Therefore, we acknowledge that our approach underestimates the number of species occurring within each city.

To assess the effect of potentially inadequate sampling on our analyses, we estimated the completeness of the species inventory in each city. Inventory completeness was calculated using an estimator of sample coverage<sup>3</sup>, which can be interpreted as the probability that a new occurrence record would not result in the observation of a previously unrecorded species. We then assessed the relationship between inventory completeness, and mean temperature and precipitation throughout urban areas (i.e. cities). For this assessment, temperature and precipitation variables were averaged for each city (i.e. averaging across all species in a given city) and plotted against inventory completeness aiming to identify a trend in variability in climate means as completeness increased. A

variable that is sensitive to inventory completeness would show a "funnel effect" with higher variability at low completeness, thereby indicating biased samples (**Figure 7**).

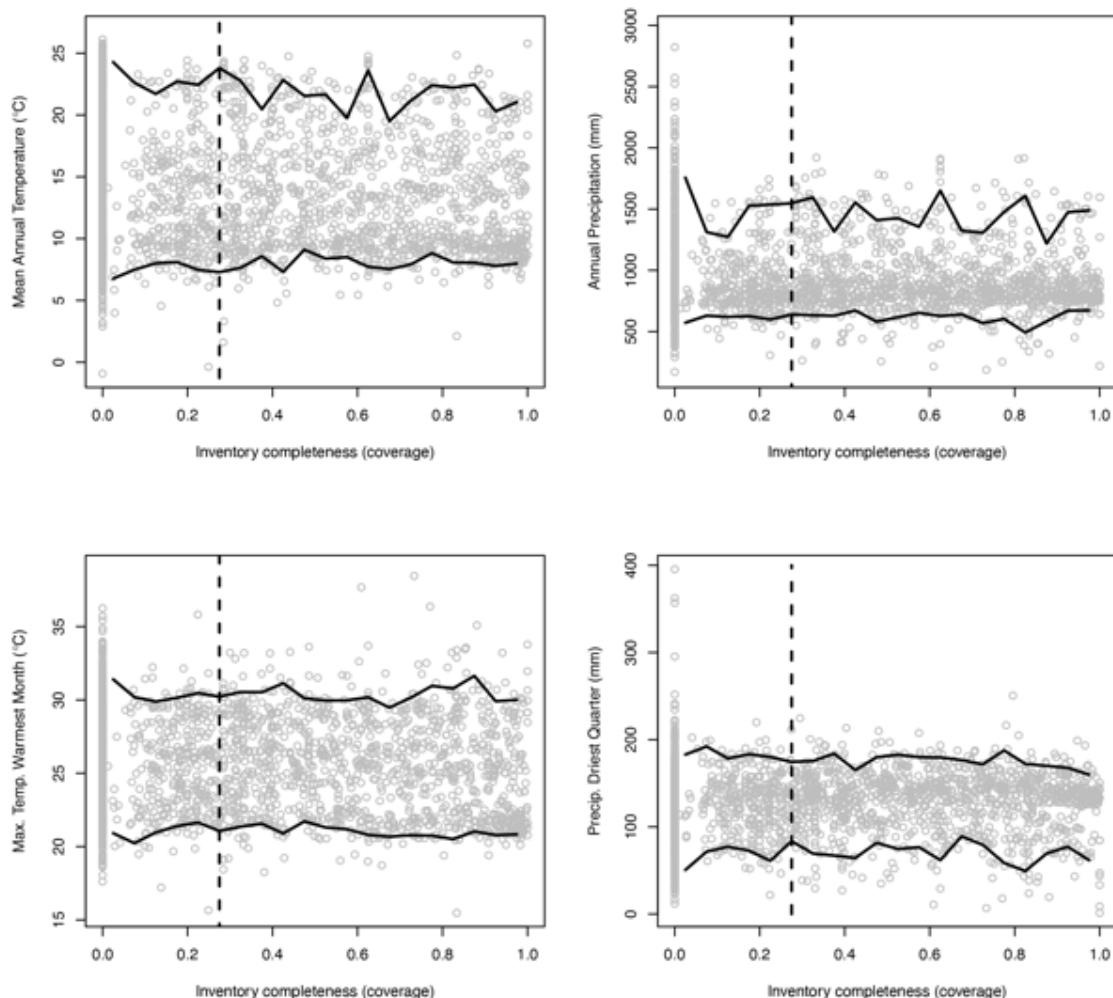

**Figure 7.** Average climate value for each city (mean annual temperature, annual precipitation, maximum temperature of the warmest month, and precipitation of the driest quarter) plotted against the cities' species coverage. For each plot, we plotted the 5% and 95% quantiles for coverage bins (i.e. 0-0.05, 0.05-0.10, 0.10-0.15, etc.) and the median coverage.

Although our results indicated that the climate variables are robust to inventory completeness, we excluded cities with low completeness (<0.20) from our analyses, retaining 1,010 cities from 93 countries. The average number of cities across countries was 11 (standard deviation  $\pm$  35 cities), with a maximum of 324 in the USA, while 44 countries

were represented by a single city. The average human population across all 1,010 cities was 830,834 ( $\pm 2,193,136$  people), with a maximum of 35,676,000 in Tokyo (Japan) and a minimum of 246 people in Theodore (Australia).

### **Methodological approach**

First, species realised niches (assessed here) are not equal to their fundamental niche. We used occurrence records to approximate distribution, but biological factors such as competition, abiotic factors (e.g. soil and nutrients) and dispersal limits may mean that our use of occurrence records underestimate species' climate envelopes. Second, climate data based on coarse-grained spatial interpolations from weather stations that are shielded from direct solar radiation used here, fail to identify areas where harsh conditions can be exacerbated due to the urban heat island effect<sup>4</sup> or areas where conditions are more benign due to the vegetation effect on microclimate (e.g. high canopy cover)<sup>5</sup> or presence of wind<sup>6</sup>, the latter is particularly important in coastal cities. Third, our assessment did not consider other environmental factors that can mitigate or exacerbate the effects of climate change, such as the presence/absence of water bodies, soil type and topography. Fourth, our approach does not consider species' adaptive capacity, which facilitate species' resilience to climate change, and the potential feedback mechanisms between climate and biota (e.g. the role of vegetation in modulating temperature). Additional factors that were not considered in our approach, such as urban heat island effect, sea level rise, human impacts (e.g. exploitation and pollution), land-use change and deforestation, also erode the resilience of cities to climate change. Finally, by selecting a more conservative scenario (i.e. RCP6.0) following Raftery, et al.<sup>7</sup>, our predictions might underestimate the changes in climate, compared to a less conservative scenario, such as RCP8.5<sup>8</sup>.

## Supplemental Tables and Figures

**Supplemental Table S1.** Summary of mean, median, standard deviation (SD) maximum (Max) and minimum (min) values estimated for two time periods (2050 and 2070) and two Representative Concentration Pathway (RCP 4.5 and 6.0) for mean annual temperature (MAT; °C), maximum temperature of the warmest month (MTWM; °C), annual precipitation (AP; mm), and precipitation of the driest quarter (PDQ; mm) across 1010 cities; and number of cities that are predicted to become warmer/dryer and cooler/wetter for each climate scenario.

| Variable          | Mean  | Median | SD   | Max   | Min    | Warmer/<br>dryer | Cooler/<br>wetter |
|-------------------|-------|--------|------|-------|--------|------------------|-------------------|
| MAT 2050 RCP 4.5  | 2.6   | 2.6    | 06   | 5.6   | 1.1    | 0                | 1010              |
| MAT 2050 RCP 6.0  | 2.3   | 2.2    | 0.6  | 4.5   | 1.1    | 0                | 1010              |
| MAT 2070 RCP 4.5  | 3.2   | 3.1    | 0.8  | 6.8   | 0.9    | 0                | 1010              |
| MAT 2070 RCP 6.0  | 3.2   | 3.1    | 0.9  | 6.4   | 1.3    | 0                | 1010              |
| MTWM 2050 RCP 4.5 | 1.5   | 2.3    | 0.6  | 3.6   | 0.5    | 0                | 1010              |
| MTWM 2050 RCP 6.0 | 1.1   | 1.9    | 0.5  | 3.3   | 0.2    | 0                | 1010              |
| MTWM 2070 RCP 4.5 | 1.9   | 2.8    | 0.7  | 4.4   | 1.2    | 0                | 1010              |
| MTWM 2070 RCP 6.0 | 1.8   | 2.8    | 0.7  | 4.2   | 0.9    | 0                | 1010              |
| AP 2050 RCP 4.5   | -53.7 | -42    | 72.8 | 363.5 | -484.6 | 856              | 154               |
| AP 2050 RCP 6.0   | -50.9 | -35.7  | 72.4 | 291.6 | -575.6 | 820              | 190               |
| AP 2070 RCP 4.5   | -62.5 | -48.6  | 87   | 537.2 | -601.7 | 817              | 193               |
| AP 2070 RCP 6.0   | -58.5 | -48.4  | 83.1 | 387.8 | -562.7 | 805              | 205               |
| PDQ 2050 RCP 4.5  | -0.6  | -0.6   | 10.3 | 29    | -43    | 535              | 475               |
| PDQ 2050 RCP 6.0  | -0.5  | -0.5   | 8.6  | 36    | -44    | 531              | 479               |
| PDQ 2070 RCP 4.5  | -0.4  | -0.4   | 12.4 | 52    | -61    | 539              | 471               |
| PDQ 2070 RCP 6.0  | -0.8  | -0.8   | 11.6 | 38    | -67    | 531              | 479               |

**Supplemental Table S2.** Climate variables selected for this study. More details on climate variables can be found in O'Donnell and Ignizio <sup>9</sup>

| <b>Climate variable</b>                  | <b>Abbreviation</b> | <b>Units</b> | <b>Description</b>                                                                                                                      |
|------------------------------------------|---------------------|--------------|-----------------------------------------------------------------------------------------------------------------------------------------|
| Mean annual temperature                  | MAT                 | °C           | The mean temperature of a 12-monthly period. Calculated as the mean of the summed average temperature of the <i>i</i> th day of a year. |
| Maximum temperature of the warmer period | MTWM                | °C           | The maximum temperature of a given period. The period can be calculated as a week or a month. The default period is a week.             |
| Annual precipitation                     | AP                  | mm           | The sum of all precipitation values.                                                                                                    |
| Precipitation of the driest quarter      | PDQ                 | mm           | The minimum total precipitation during a quarter. A quarter is defined as three consecutive months (1,2,3,...,10,11,12).                |

**Supplemental Table S3.** Global Circulation Models (GCMs) from the 10 CMIP5 models considered in this study.

| <b>GCM</b>     | <b>Country</b> | <b>Reference</b>                                                                                                                                                                  |
|----------------|----------------|-----------------------------------------------------------------------------------------------------------------------------------------------------------------------------------|
| Bcc-csm1-1     | China          | Wu, et al. <sup>10</sup>                                                                                                                                                          |
| CCSM4          | USA            | <a href="https://www2.cesm.ucar.edu/models">https://www2.cesm.ucar.edu/models</a>                                                                                                 |
| CESM1-CAM5     | USA            | <a href="https://www2.cesm.ucar.edu/models">https://www2.cesm.ucar.edu/models</a>                                                                                                 |
| CSIRO-Mk3-6-0  | Australia      | Jeffrey, et al. <sup>11</sup>                                                                                                                                                     |
| GFDL-CM3       | USA            | <a href="http://www.gfdl.noaa.gov/earthsystem-model">http://www.gfdl.noaa.gov/earthsystem-model</a>                                                                               |
| HADGEM2-AO     | Korea          | <a href="http://cms.ncas.ac.uk/wiki/UM/Configurations/HadGEM2">http://cms.ncas.ac.uk/wiki/UM/<br/>Configurations/HadGEM2</a>                                                      |
| IPSL-CM5A-MR   | France         | <a href="http://icmc.ipsl.fr/index.php/icmc-models/icmc-ipsl-cm5">http://icmc.ipsl.fr/index.php/<br/>icmc-models/icmc-ipsl-cm5</a>                                                |
| MIROC5         | Japan          | Watanabe, et al. <sup>12</sup>                                                                                                                                                    |
| MIROC-ESM-CHEM | Japan          | <a href="http://www.wcrp-climate.org/wgcm/WGCM15/presentations/21Oct/KIMOTO_Japan.pdf">http://www.wcrp-climate.org/<br/>wgcm/WGCM15/presentations/<br/>21Oct/KIMOTO_Japan.pdf</a> |
| NorESM1-M      | Norway         | <a href="https://verc.enes.org/ISENES2/models/earthsystem-models/ncc/noresm">https://verc.enes.org/ISENES2/<br/>models/earthsystem-models/<br/>ncc/noresm</a>                     |

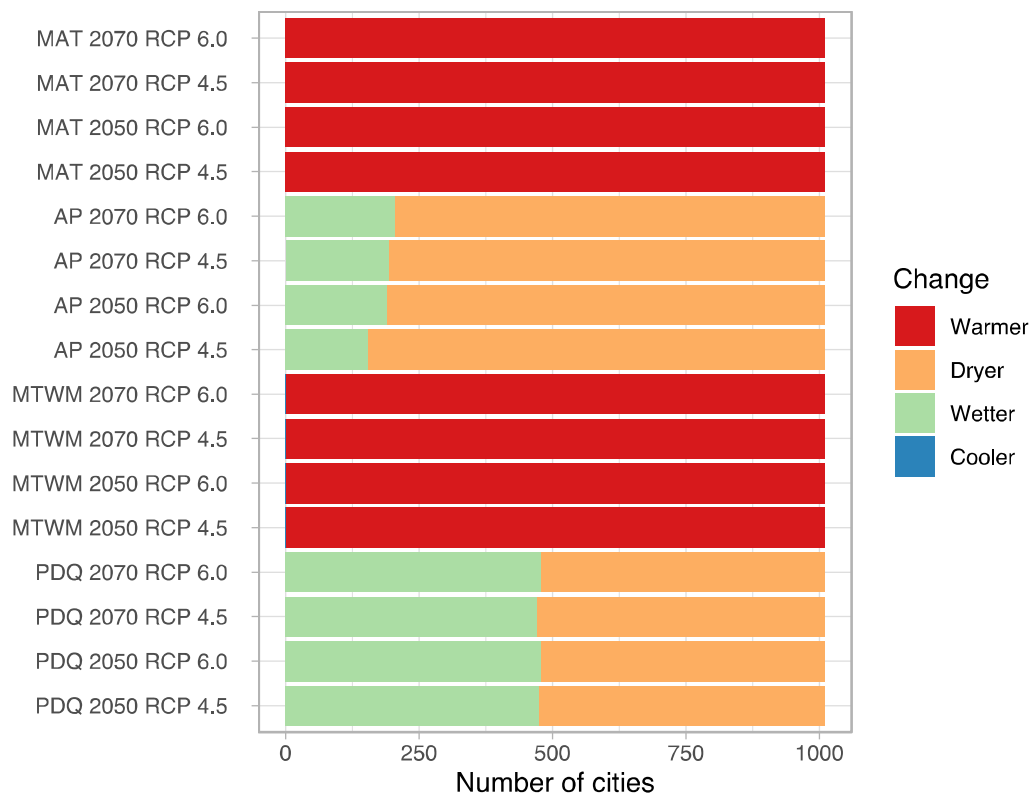

**Supplemental Figure S1.** Number of cities ( $n=1,010$ ) predicted to become warmer/cooler and dryer/wetter in two time periods (2050 and 2070) and under two Representative Concentration Pathway (RCPs; 4.6 and 6.0). MAT = mean annual temperature, AP = annual precipitation, MTWM = maximum temperature of the warmest month, and PDQ = precipitation of the driest quarter.

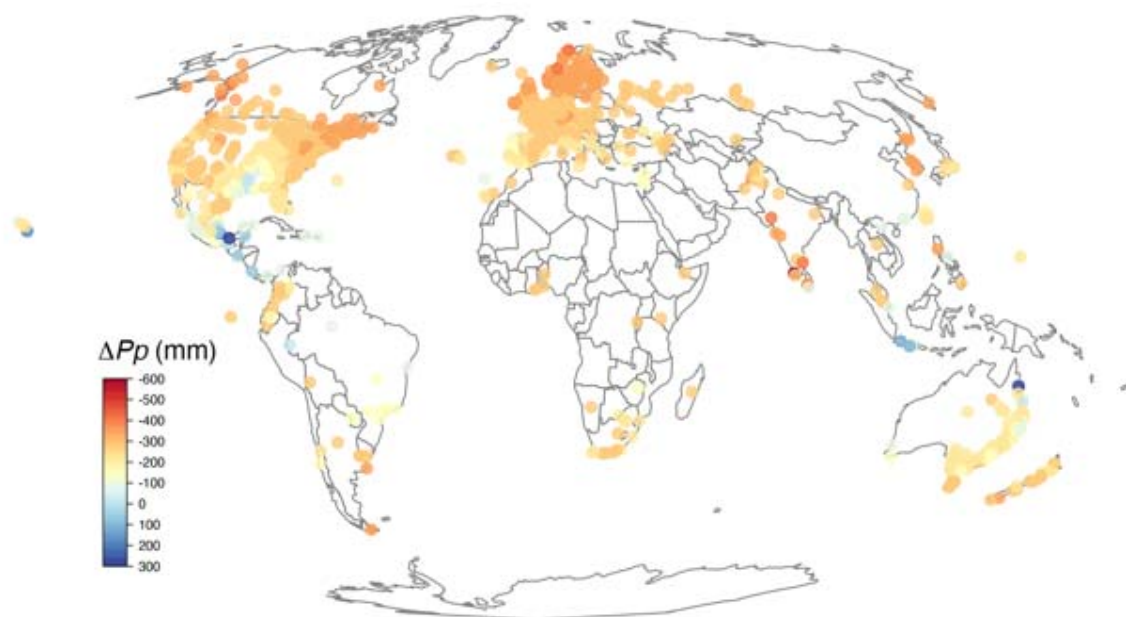

**Supplemental Figure S2.** Changes (i.e. exposure) in annual precipitation (AP) predicted to occur by 2050. Data for RCP6.0.



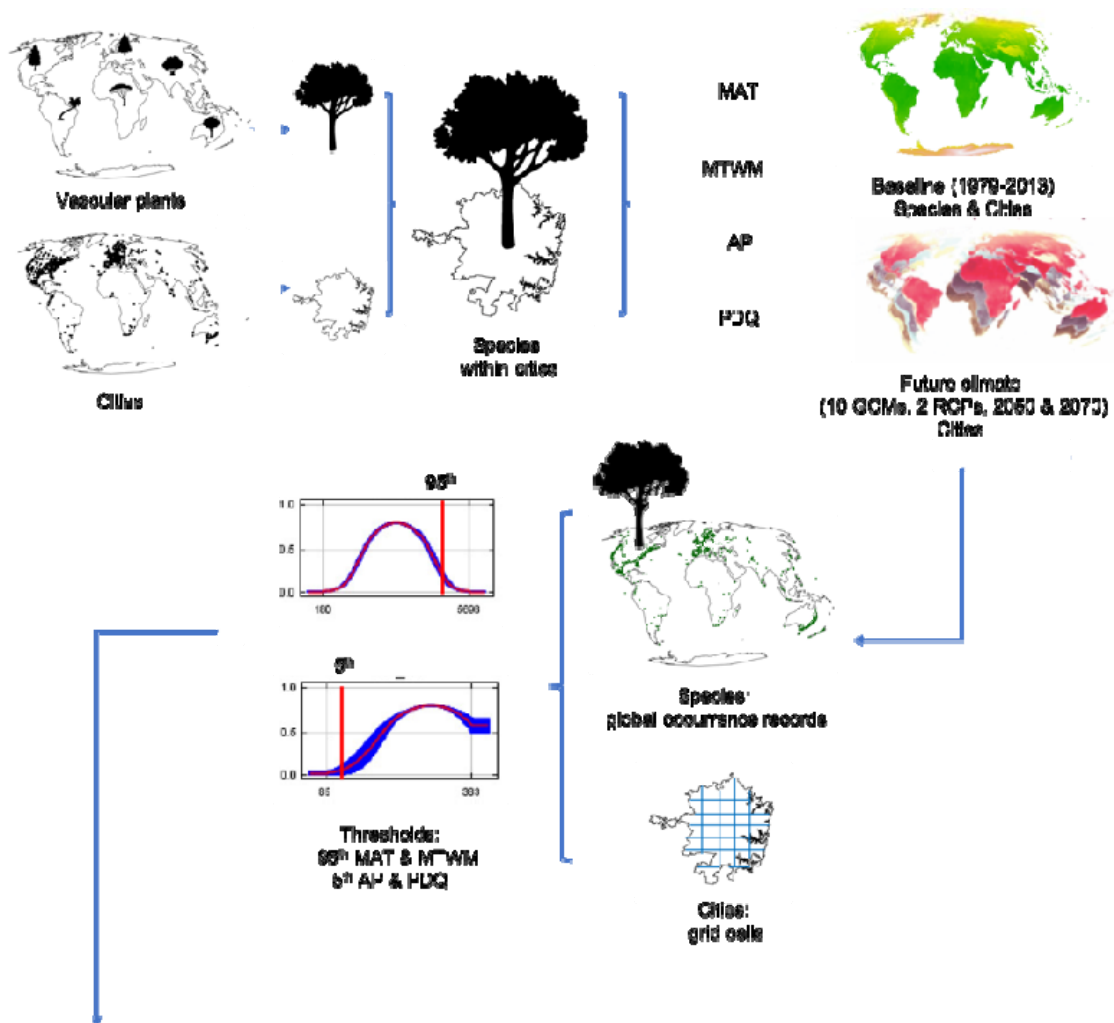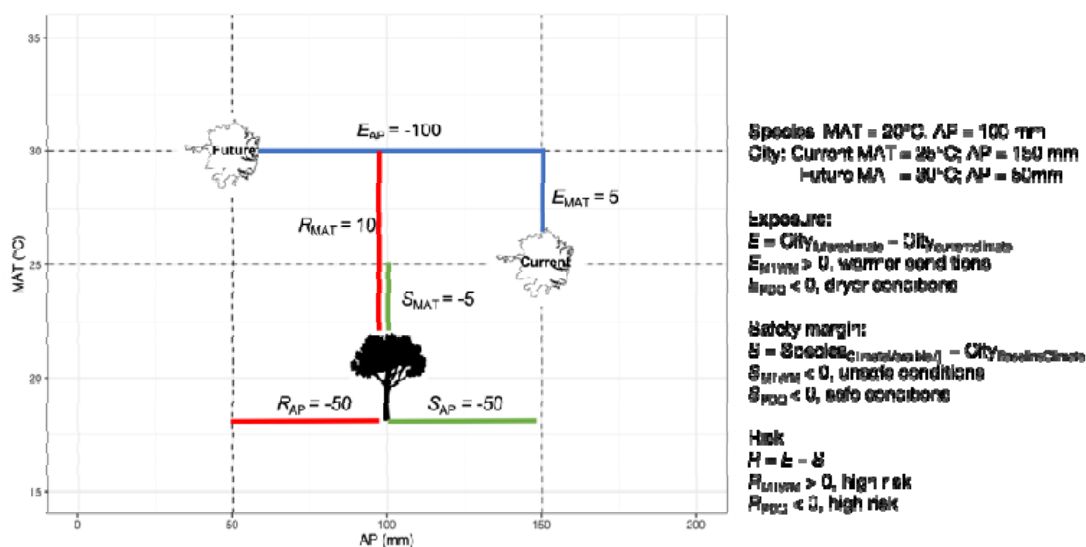

**Supplemental Figure S3.** We obtained occurrence records for all tracheophytes and polygons defining the boundaries of cities globally. Then, we identified species occurring only within cities (i.e. 16,006 species). Climate data were downloaded for four climate variables (mean annual temperature [MAT; °C], maximum temperature of the warmest month [MTWM; °C], annual precipitation [AP; mm], and precipitation of the driest quarter [PDQ; mm]) for baseline (average for 1979-2013) and future conditions (10 General Circulation Models [GCMs], two time periods 2050 [average for 2041-2060] and 2070 [average for 2061-2080], and two Representative Concentration Pathways [RCP] 4.5 and 6.0). We used baseline climate to estimate species' realized niches from all global occurrence records (i.e. within and outside cities). Baseline and future climate were used to estimate cities' climate from a grid (1 × 1 km) placed over its area. We then estimated the threshold of the 95<sup>th</sup> percentile of MAT/MTWM and the 5<sup>th</sup> percentile of AP/PDQ to assess the extremes of these variables as indicative of niche tolerance. For each city, we estimated its exposure to climate change (i.e. a measure of how much the climate is projected to change [e.g. warmer and drier] between current and future climatic conditions); in this example, the city will become 5°C warmer ( $E_{MAT}$ ) and decrease 100 mm in rainfall ( $E_{AP}$ ). For each species at each city, we estimate its safety margin; i.e. an index of how much warmer (or drier) a city could become before the realized climate niches of its species is exceeded; in this example, the species is currently experiencing unsafe conditions for MAT, as the city threshold ( $City_{Current95thMAT} = 25^{\circ}C$ ) is 5°C warmer than the species' threshold ( $Species_{95thMAT} = 20^{\circ}C$ ); whereas for precipitation, the species is experiencing safe conditions, as the species' threshold ( $Species_{5thAP} = 100$  mm) is lower than the city's threshold ( $City_{Current5thAP} = 150$  mm). Finally, risk was estimated as the difference between exposure and safety margin ( $R = E - S$ ); in this example, the city is becoming warmer and dryer and for both variables the species will be at high risk. By 2050 the city will be 10°C warmer than the species MAT threshold and 50 mm dryer than the species AP threshold.

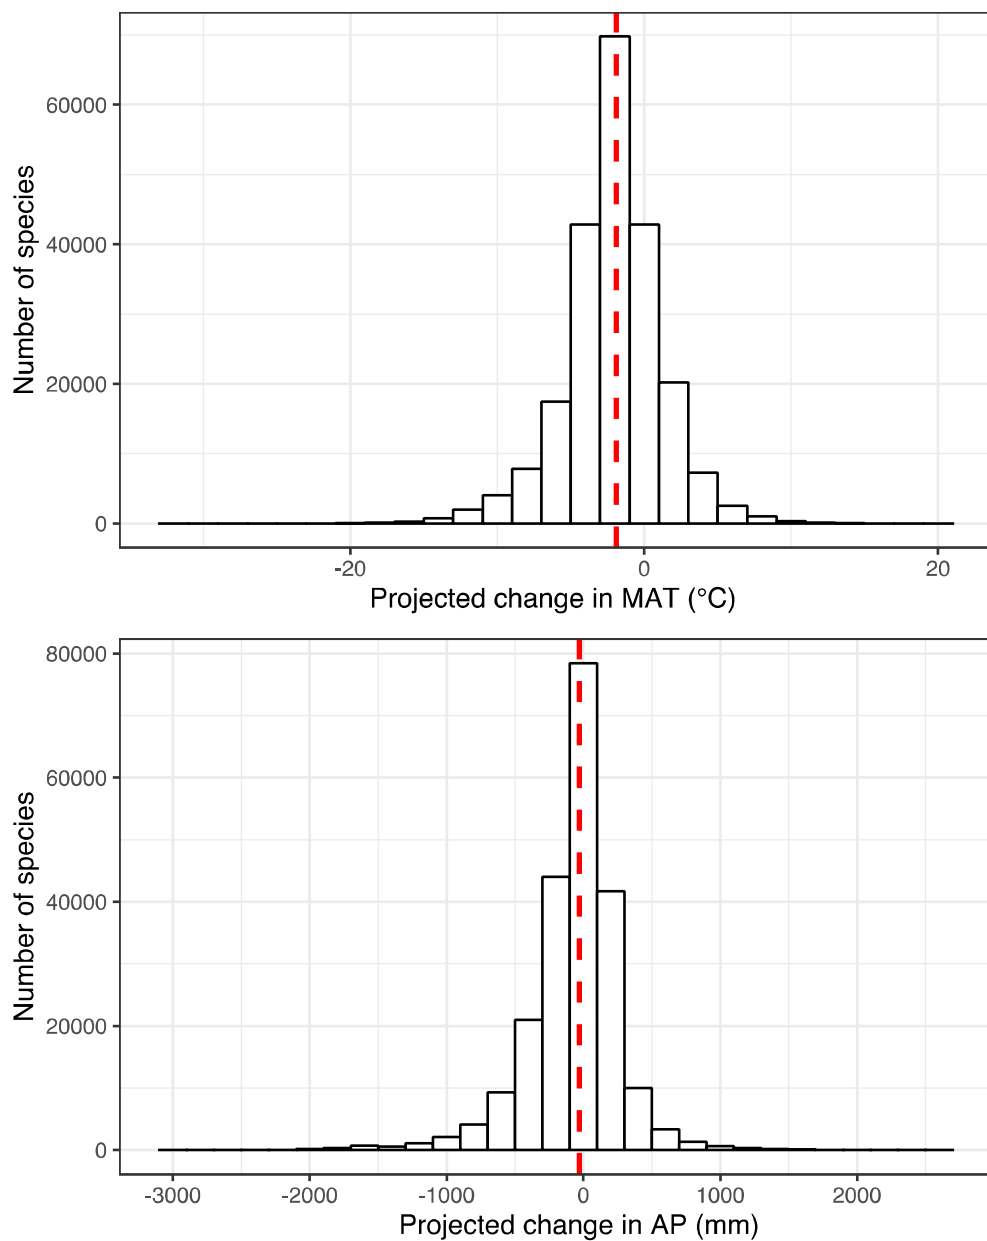

**Supplemental Figure S4.** Changes in mean annual temperature (MAT) and annual precipitation (AP) projected to occur in species' safety margin across 1,010 cities across the world by 2050 (RCP6.0). Note that the count of species exceeds the number of species, as one species can have a different safety margin depending on the city where it is planted. Median across all data is marked in red line.

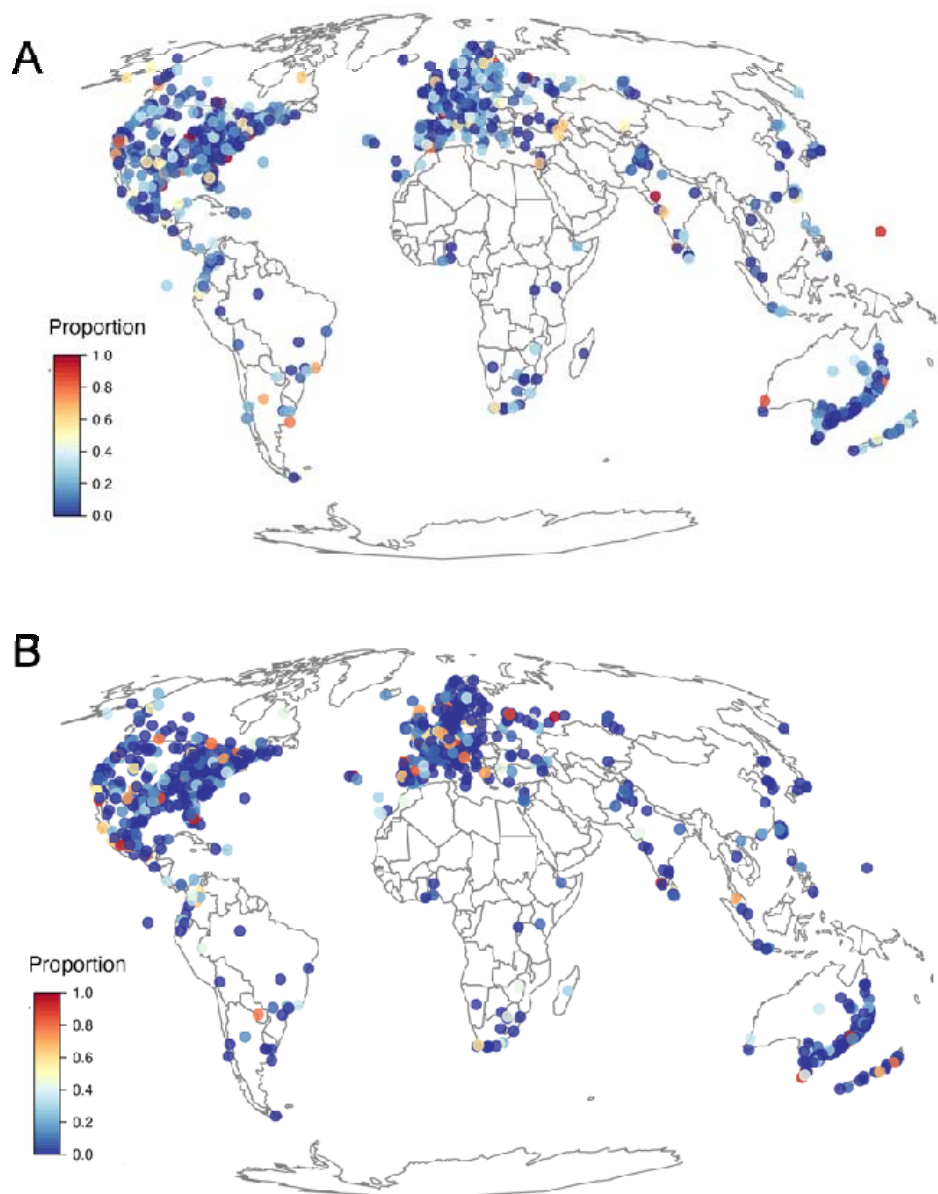

**Figure S5.** Proportion of urban forest species in each city predicted to exceed their mean annual temperature (A) and annual precipitation (B) safety margin.

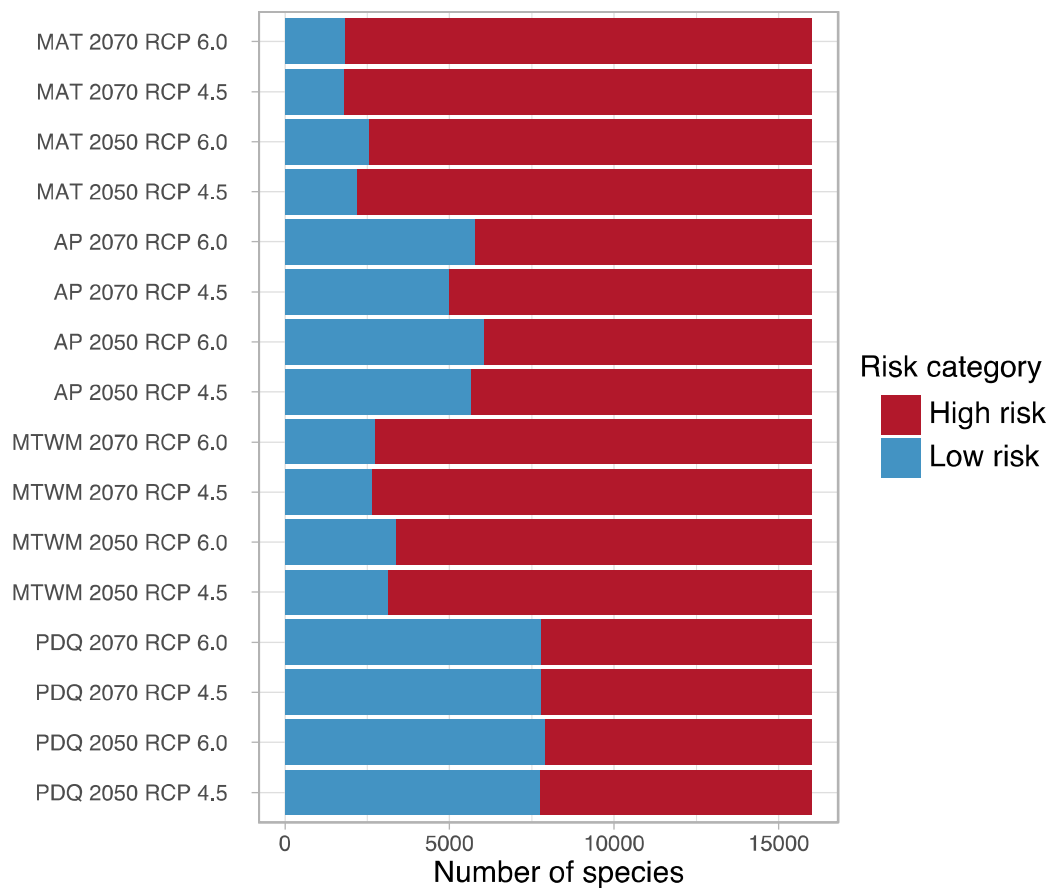

**Supplemental Figure S6.** Number of species identified to be at high and low risk of climate change for four climate variables: mean annual temperature (MAT); annual precipitation (AP); maximum temperature of the warmest month (MTWM); and precipitation of the driest quarter (PDQ); two time periods (2050 and 2070) and two Representative Concentration Pathway (RCP 4.5 and 6.0).

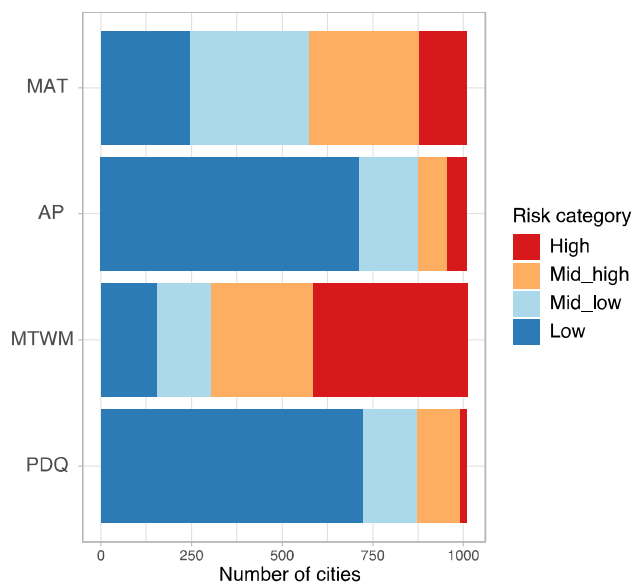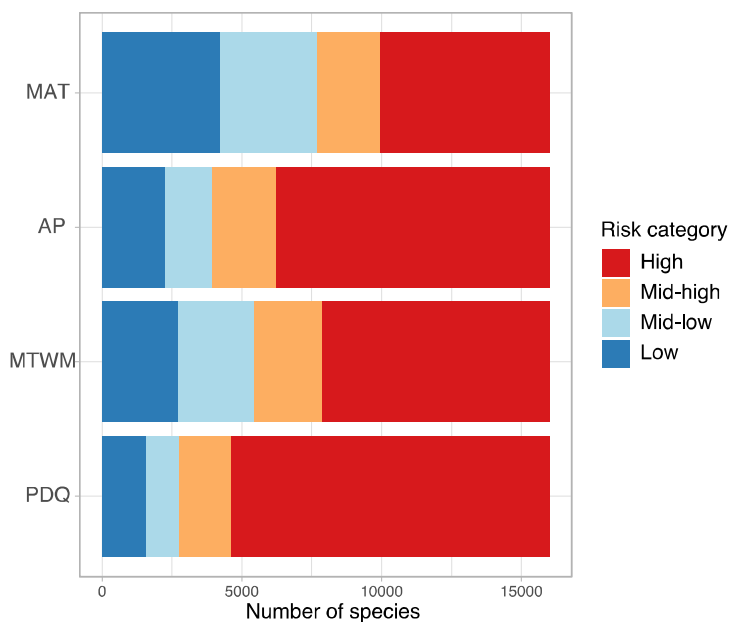

**Supplemental Figure S7.** Number of cities with proportion of species in four risk categories: high (>75%), mid-high (75-50%), mid-low (50-25%) and low (<25%) (A); and number of species with proportion of cities at each risk category (B). Data for 2050 and RCP6.0.

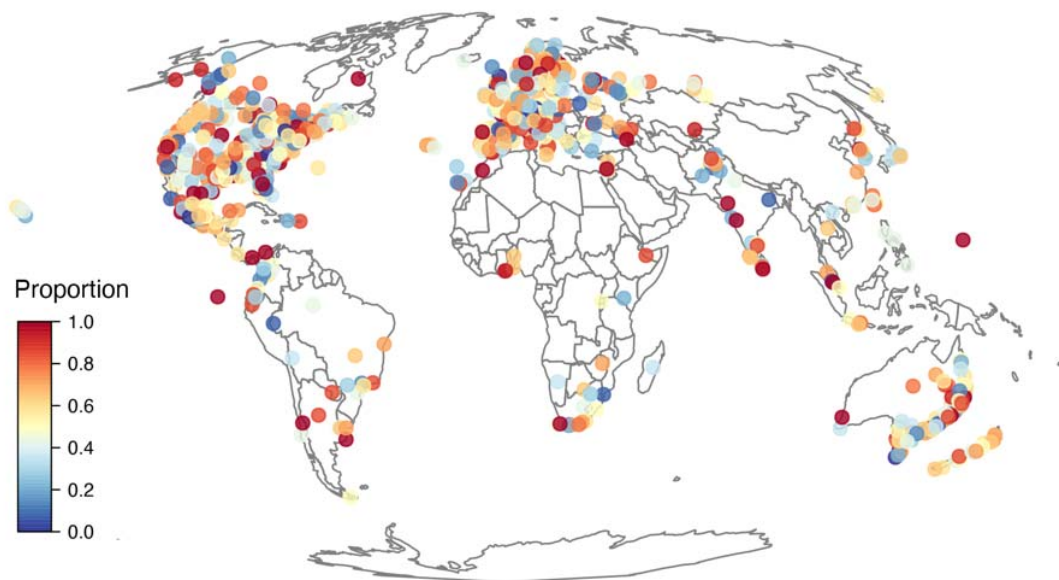

**Supplemental Figure S8.** Proportion of urban forest species in each city predicted to be at risk of future change in mean annual temperature (MAT) by 2070. Data for RCP6.0.

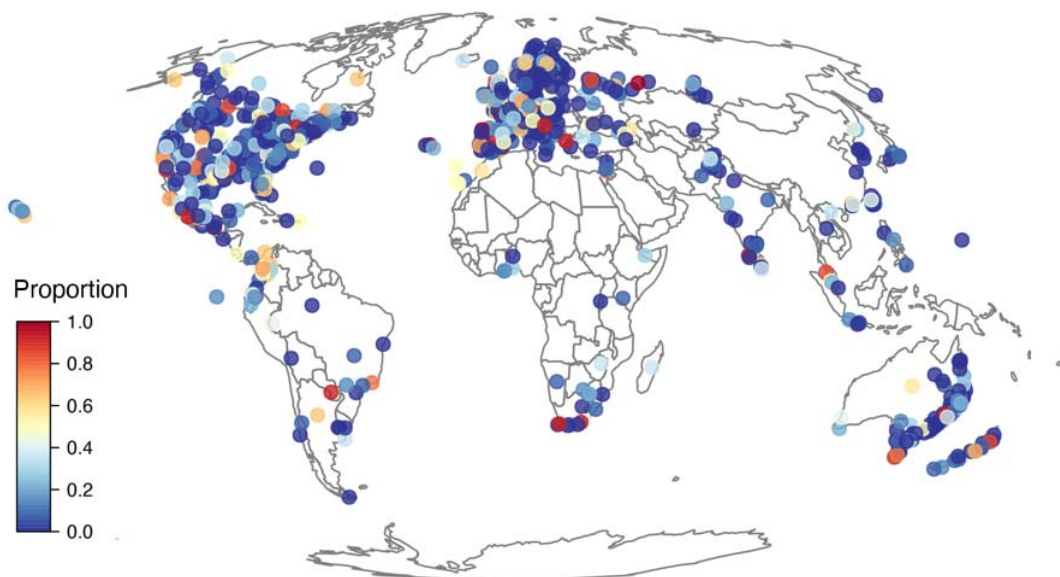

**Supplemental Figure S9.** Proportion of urban forest species in each city predicted to be at risk of future change in annual precipitation (AP) by 2070. Data for RCP6.0.

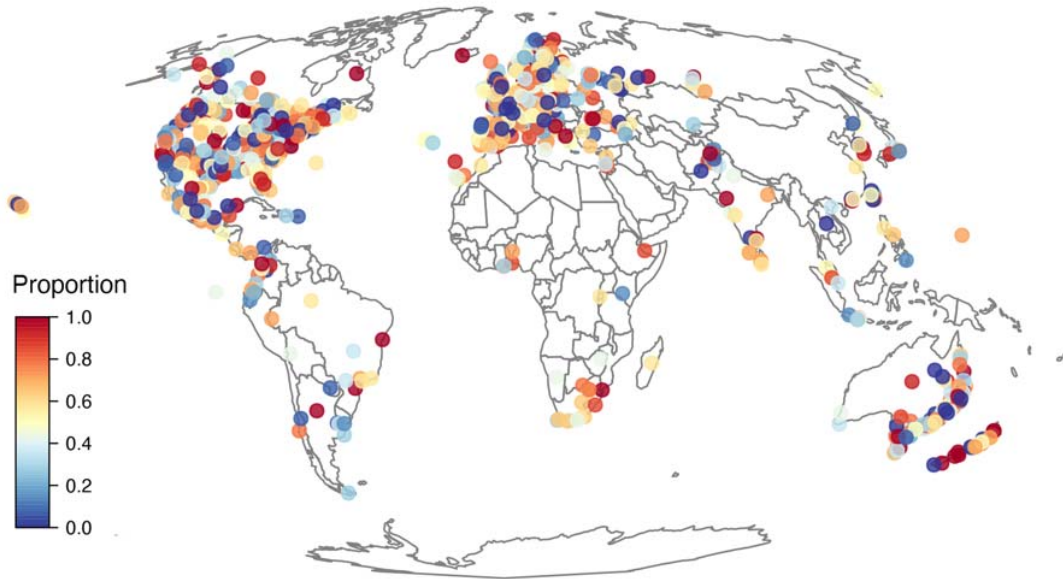

**Supplemental Figure S10.** Proportion of urban forest species in each city predicted to be at risk of future change in maximum temperature of the warmest month (MTWM) by 2070. Data for RCP6.0.

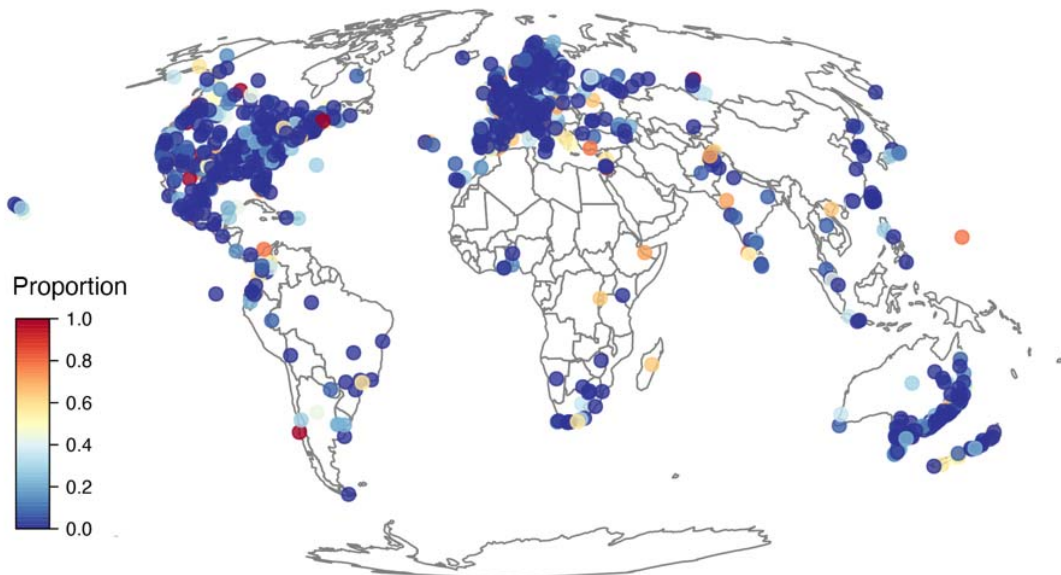

**Supplemental Figure S11.** Proportion of urban forest species in each city predicted to be at risk of future change in precipitation of the driest quarter (PDQ) by 2070. Data for RCP6.0.



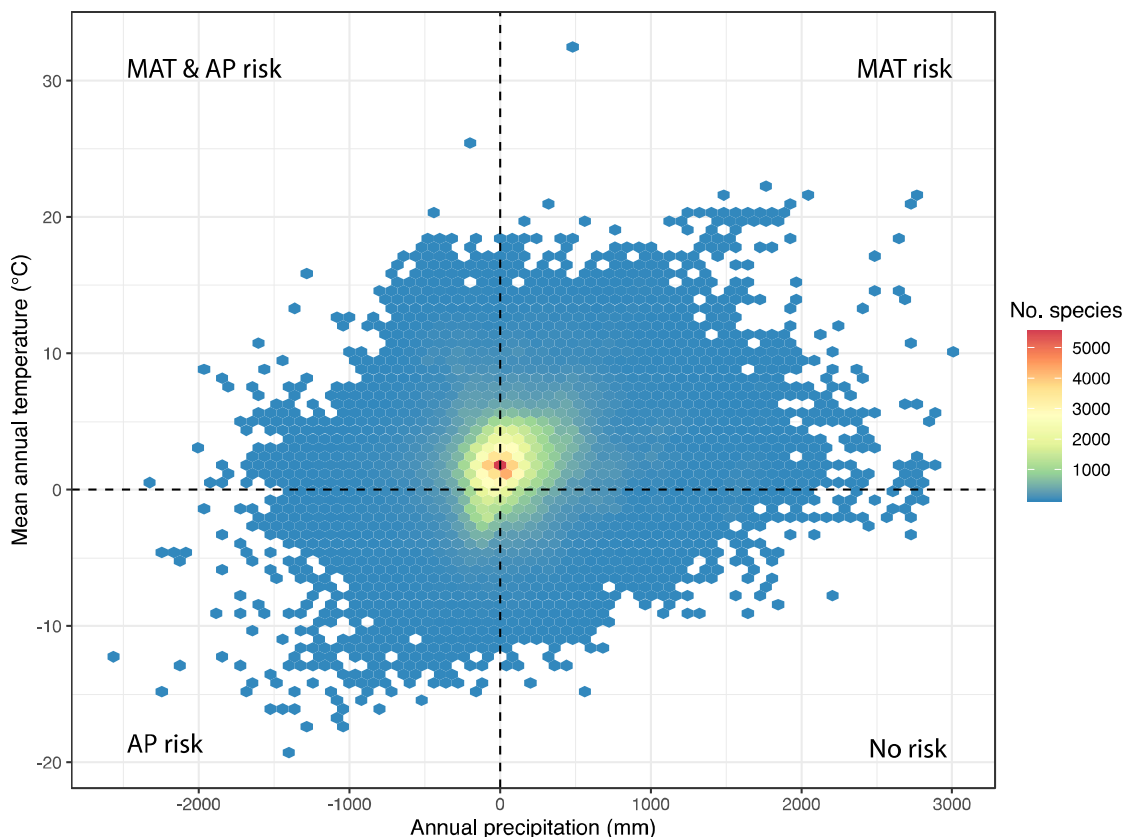

**Supplemental Figure S12.** Species at risk of change of changes in mean annual temperature and/or annual precipitation in 1,010 cities in 93 countries. For MAT,  $R > 0$  indicates the exposure to future climate is greater than the MAT 95<sup>th</sup> percentile of the focal species (i.e. high risk),  $R < 0$  indicates the exposure to future climate change is still within the range of values allowed by the safety margin (S), thus it is “safe” under future conditions (i.e. low risk). For AP,  $R > 0$  indicates the exposure to future climate is lower than its current safety margin (i.e. low risk), whereas  $R < 0$  indicates high risk, as the exposure (E) to future climate change is outside the species’ safety margin. Note that the count of species exceeds the number of species (i.e. 16,006 species), as one species can have a different safety margin depending on the city where it is planted.

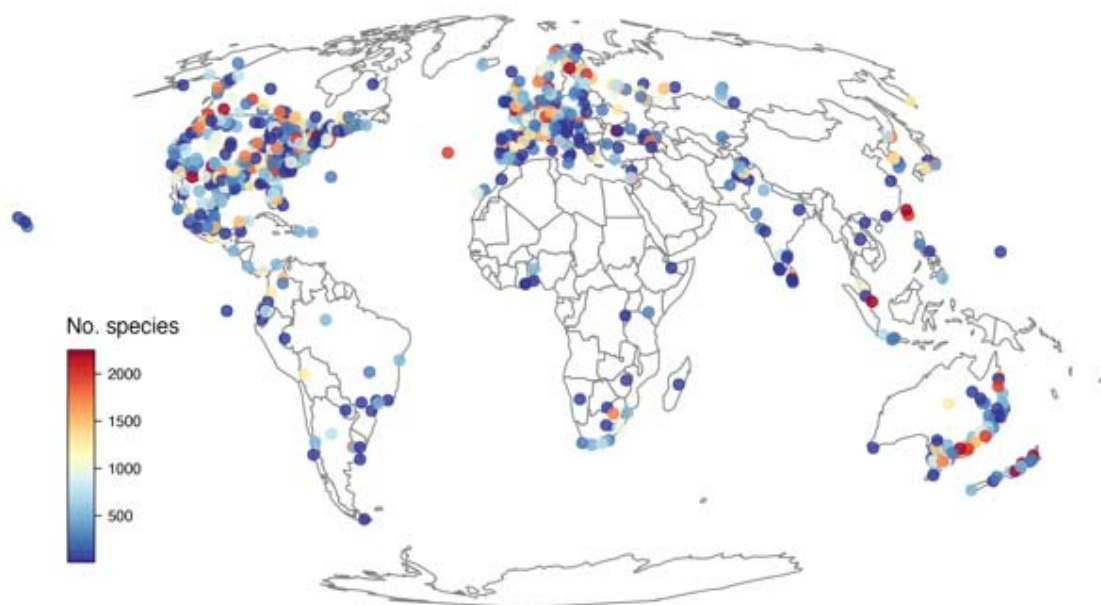

**Supplemental Figure S13.** Number of plant species recorded in 1,010 cities.

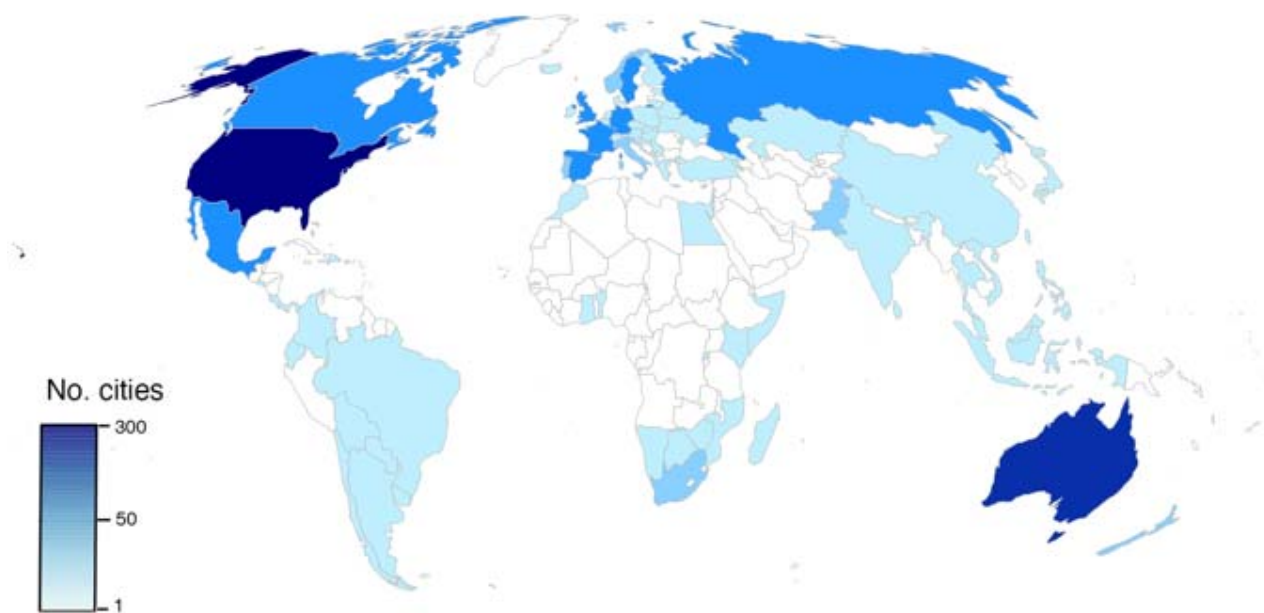

**Supplemental Figure S14.** Number of cities assessed in 93 countries.

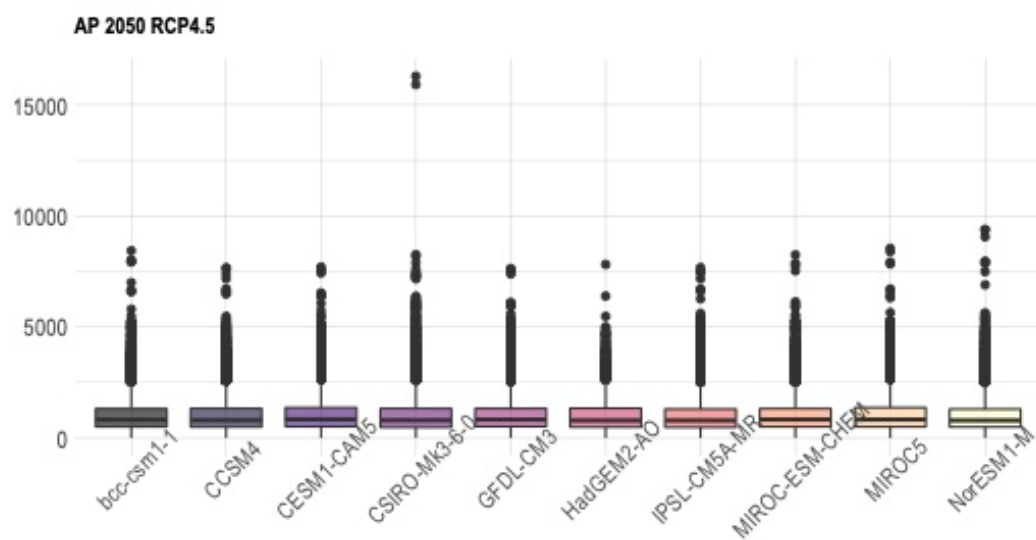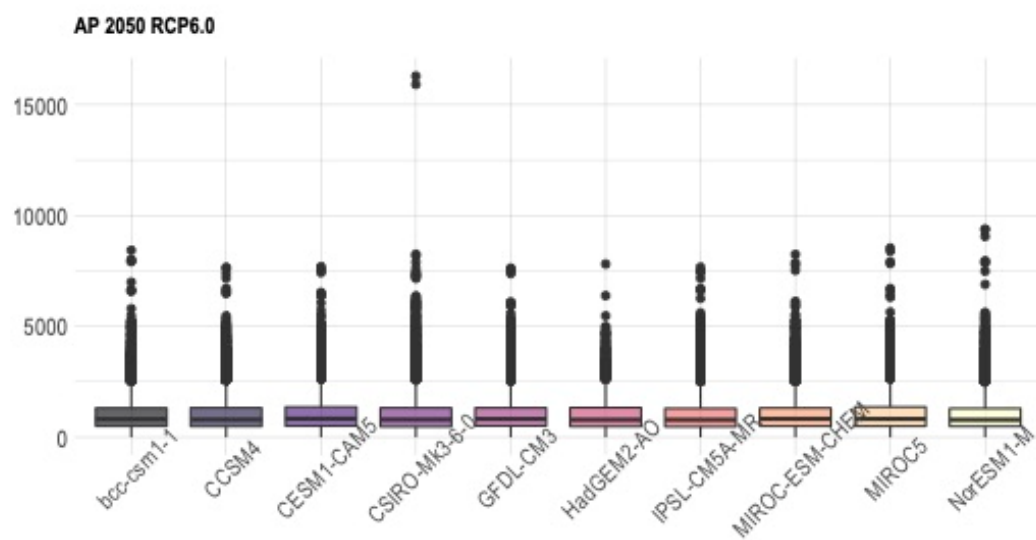

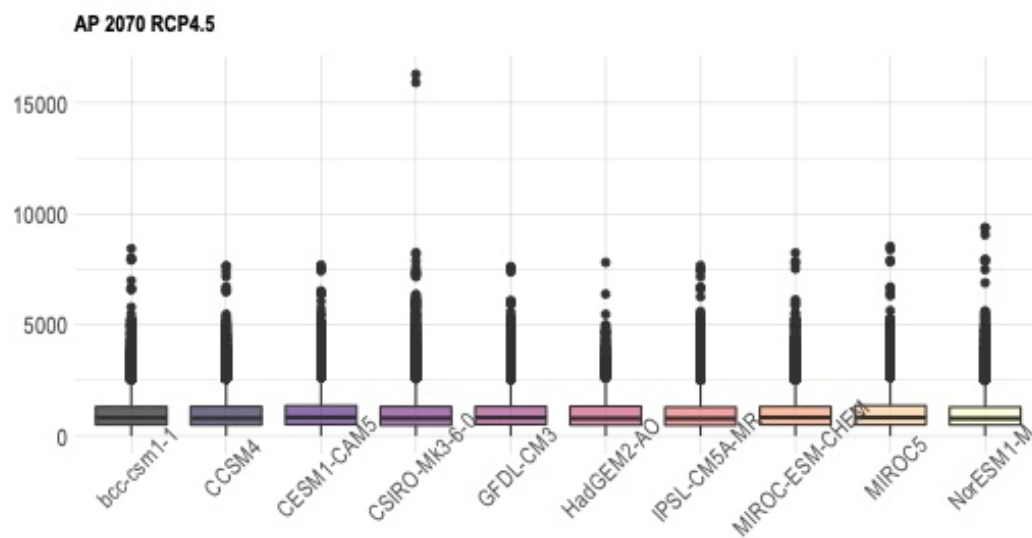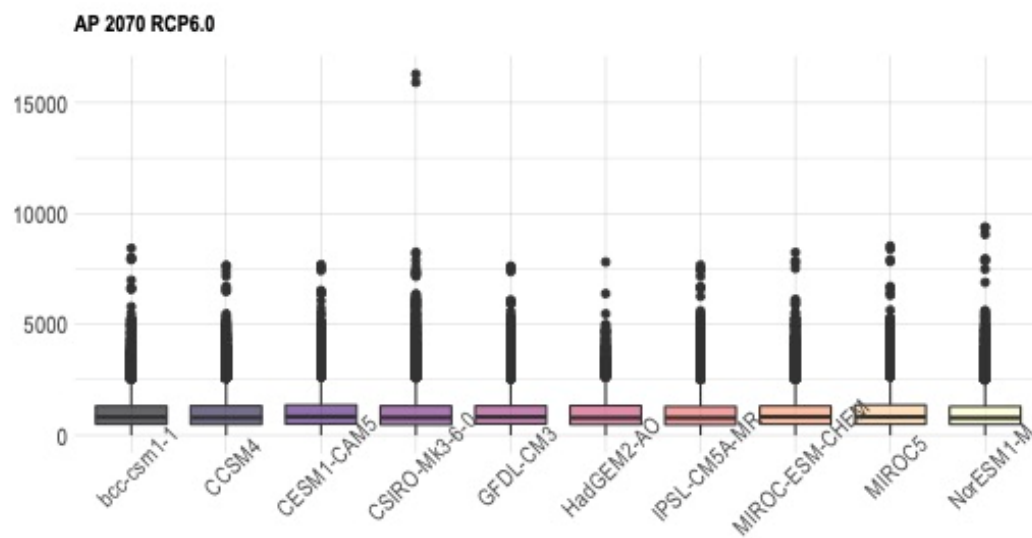

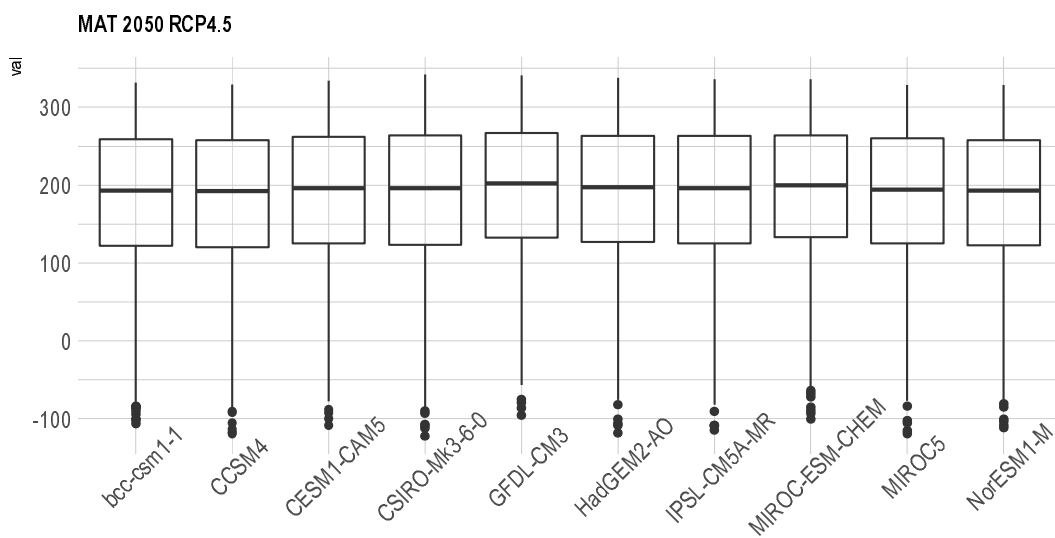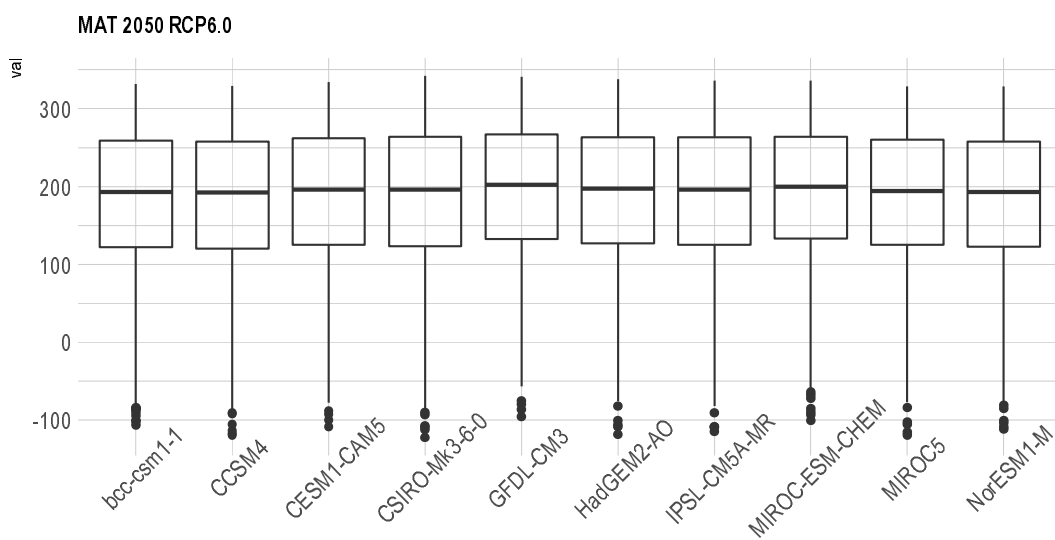

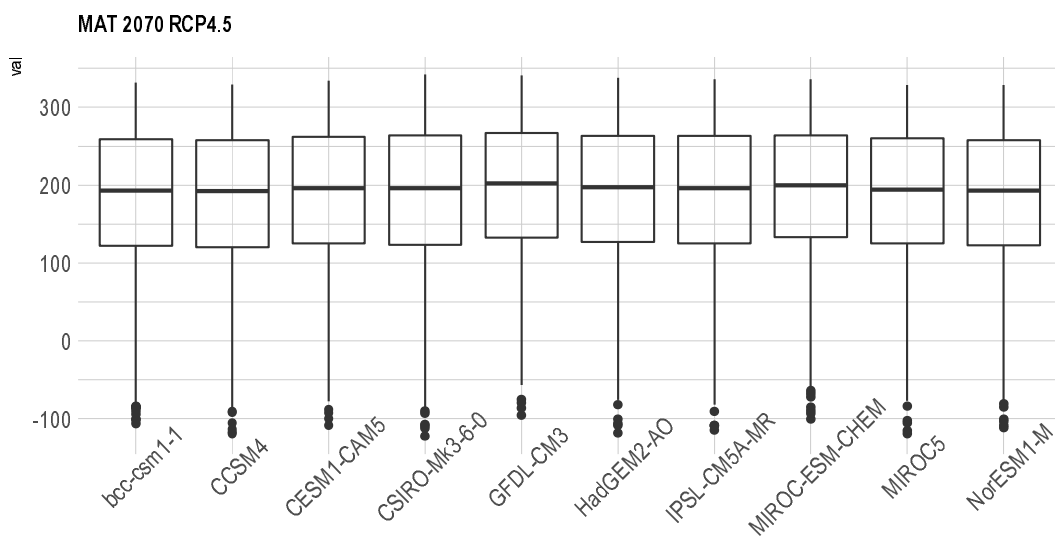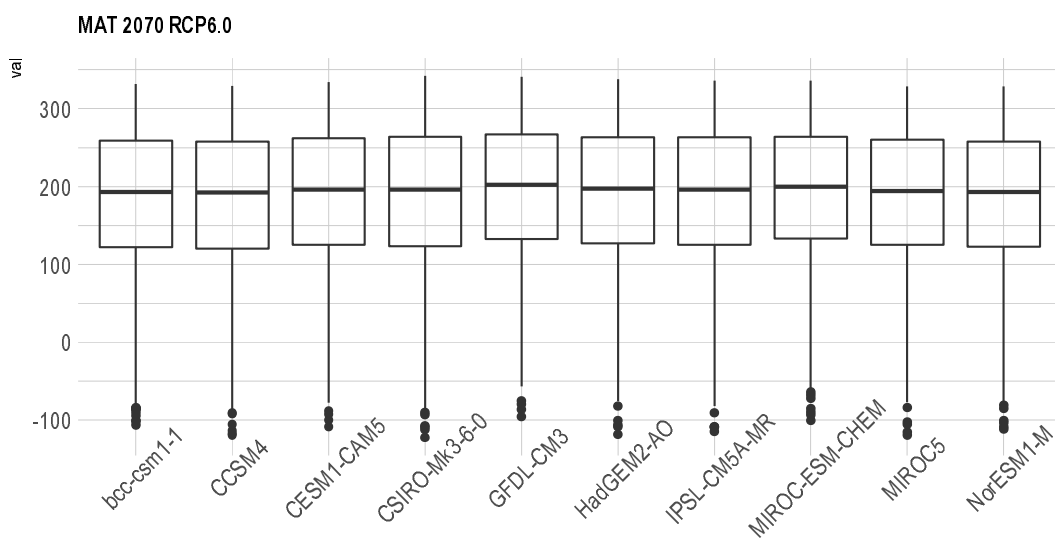

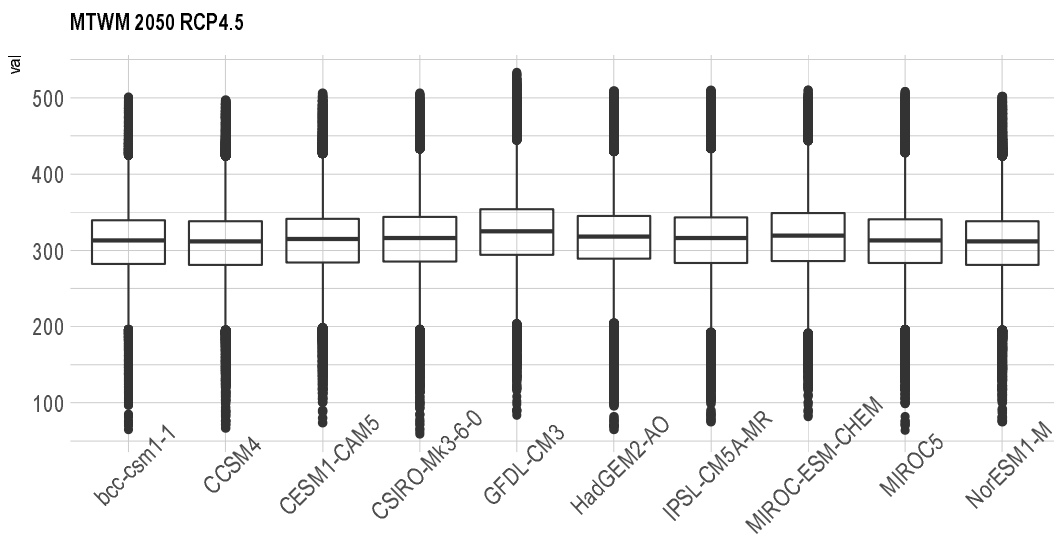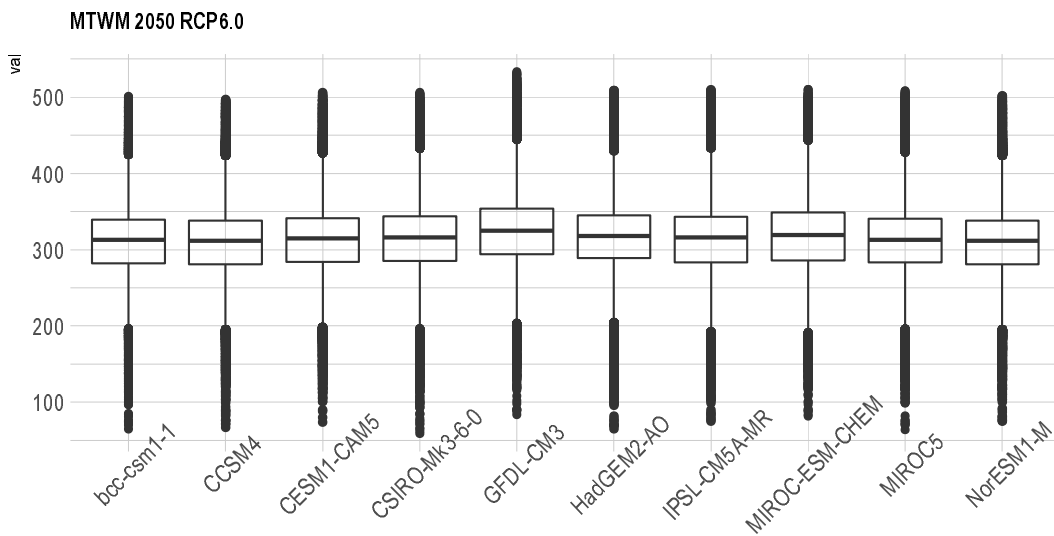

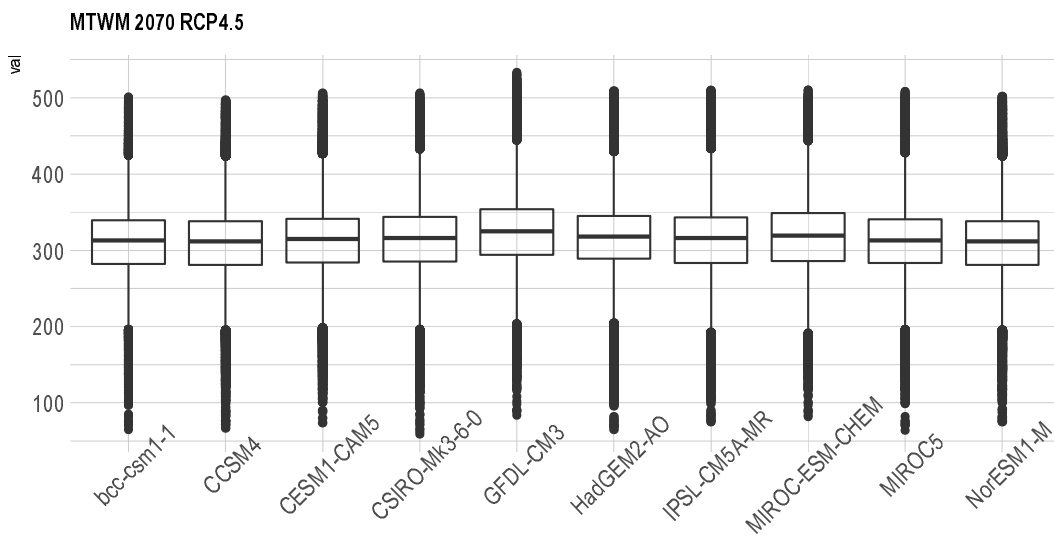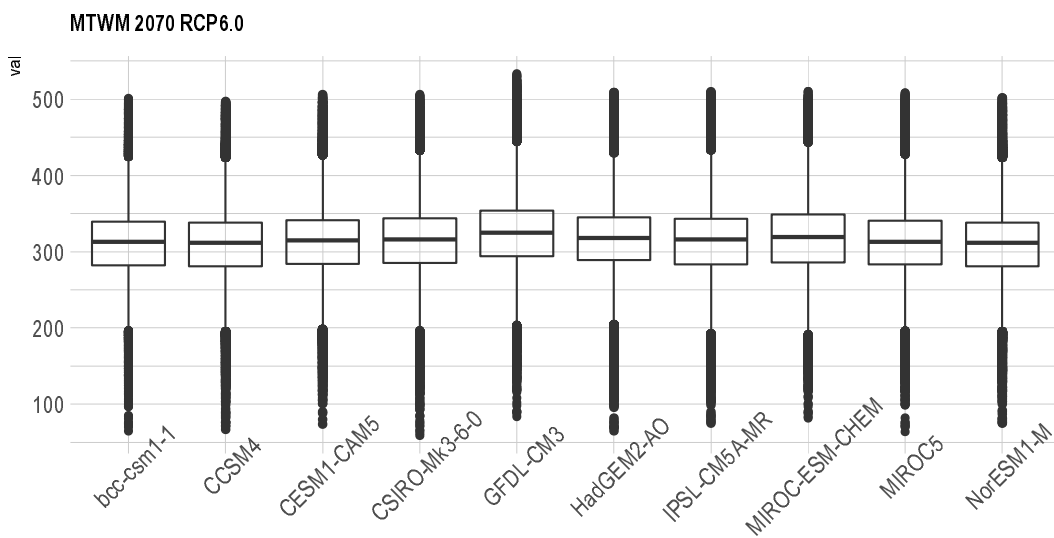



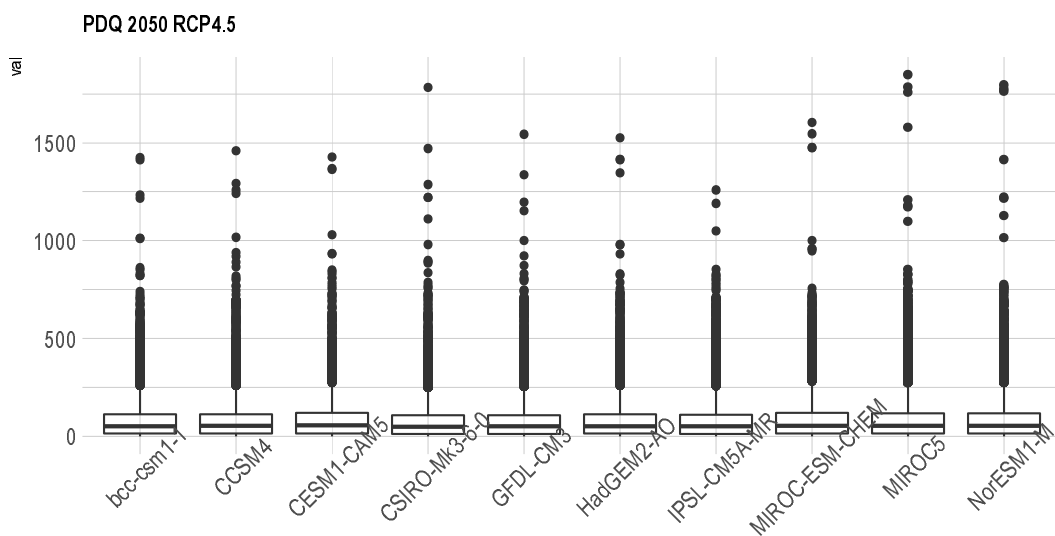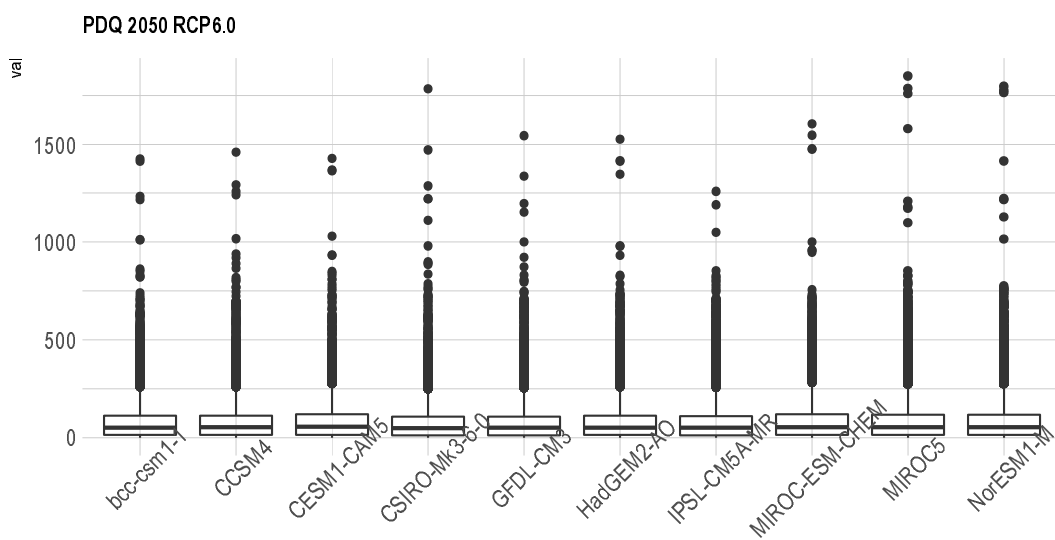

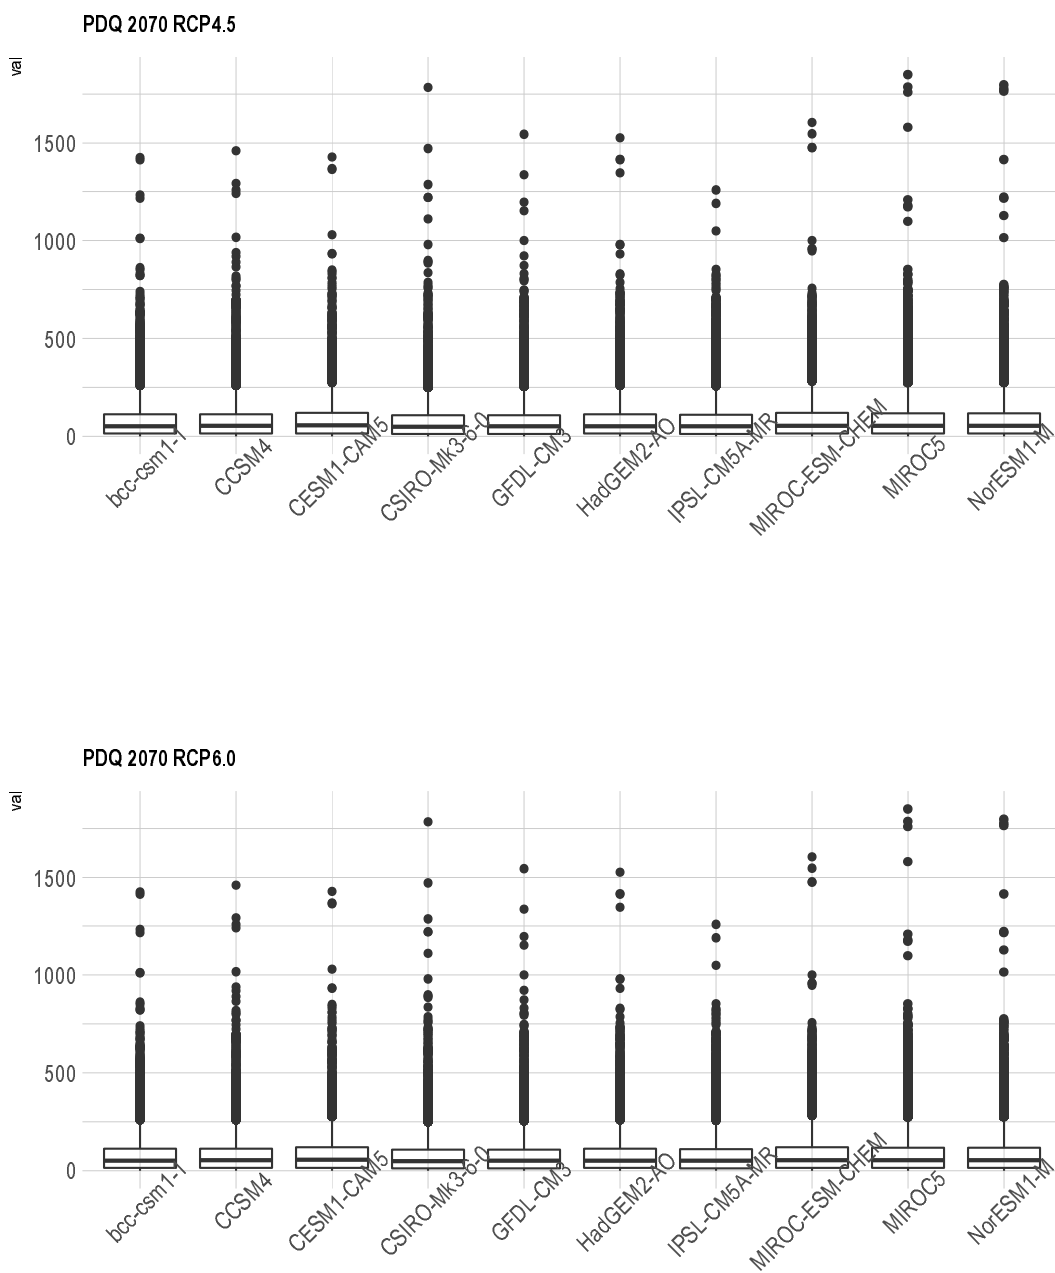

**Supplemental Figure S15.** Boxplot showing variability of 10 General Circulation Models (GCMs) for four climatic variables (AP: annual precipitation; MAT: mean annual temperature; MTWM: maximum temperature of the warmer month; and PDQ: precipitation of the driest quarter); two time periods (2050: average for 2041-2060; 2070: average for 2061-2080), and two Representative Concentration Pathway (RCP 4.5 and 6.0).

## References

- 1 Daru, B. H. *et al.* Widespread sampling biases in herbaria revealed from large-scale digitization. *New Phytologist* **217**, 939-955 (2018).
- 2 Haque, M., Nipperess, D. A., Gallagher, R. V. & Beaumont, L. J. How well documented is Australia's flora? Understanding spatial bias in vouchered plant specimens. *Austral Ecology* **42**, 690-699 (2017).
- 3 Chao, A. & Jost, L. Coverage-based rarefaction and extrapolation: standardizing samples by completeness rather than size. *Ecology* **93**, 2533-2547 (2012).
- 4 Corburn, J. Cities, climate change and urban heat island mitigation: Localising global environmental science. *Urban Studies* **46**, 413-427 (2009).
- 5 Alavipanah, S., Wegmann, M., Qureshi, S., Weng, Q. & Koellner, T. The role of vegetation in mitigating urban land surface temperatures: A case study of Munich, Germany during the warm season. *Sustainability* **7**, 4689-4706 (2015).
- 6 Kidder, S. Q. & Essenwanger, O. M. The effect of clouds and wind on the difference in nocturnal cooling rates between urban and rural areas. *Journal of Applied Meteorology* **34**, 2440-2448 (1995).
- 7 Raftery, A. E., Zimmer, A., Frierson, D. M., Startz, R. & Liu, P. Less than 2 C warming by 2100 unlikely. *Nature Climate Change* **7**, 637-641 (2017).
- 8 Schwalm, C. R., Glendon, S. & Duffy, P. B. RCP8. 5 tracks cumulative CO2 emissions. *Proceedings of the National Academy of Sciences* **117**, 19656-19657 (2020).
- 9 O'Donnell, M. S. & Ignizio, D. A. Bioclimatic predictors for supporting ecological applications in the conterminous United States. *US Geological Survey Data Series* **691** (2012).
- 10 Wu, T. *et al.* An overview of BCC climate system model development and application for climate change studies. *Journal of Meteorological Research* **28**, 34-56 (2014).
- 11 Jeffrey, S. *et al.* Australia's CMIP5 submission using the CSIRO-Mk3. 6 model. *Australian Meteorological and Oceanographic Journal* **63**, 1-13 (2013).
- 12 Watanabe, M. *et al.* Improved climate simulation by MIROC5: Mean states, variability, and climate sensitivity. *Journal of Climate* **23**, 6312-6335 (2010).
